# Supplementary material for: Direct C-metallation of N-substituted triazoles promoted by mercury acetate. An alternative route to N-heterocyclic carbene complexes
Source: Royal Society of Chemistry journal article supplement (doi:10.1039/c7ra00163k), 2017-01-01
Supplement: c7ra00163k1.pdf [file c7ra00163k1.pdf]

## Supporting Information

### Direct C-Metallation of *N*-Substituted Triazoles Promoted by Mercury Acetate. An Alternative Route to *N*-Heterocyclic Carbene Complexes

Nai-Chieh Lin, Herbert J. H.Syu, Abbas Raja Naziruddin, Fu-Chen Liu\*, Ivan J. B. Lin\*

Department of Chemistry, National Dong Hwa University, Hualien 974, Taiwan, ROC

|             |                                                                                                                                    |     |
|-------------|------------------------------------------------------------------------------------------------------------------------------------|-----|
| Figure S1.  | ORTEP of <b>3a</b>                                                                                                                 |     |
| Figure S2.  | $^1\text{H-NMR}$ of $[\text{Hg}_2(\text{Ph-Taz})_2(\text{OAc})_2]_\infty$ ( <b>1a</b> ) in $\text{DMSO-d}_6$                       |     |
| Figure S3.  | $^1\text{H-NMR}$ of $[\text{Hg}_2(\text{Py-Taz})_2(\text{OAc})_2]_\infty$ ( <b>1b</b> ) in $\text{DMSO-d}_6$                       |     |
| Figure S4.  | $^1\text{H-NMR}$ of $[\text{Hg}_2(\text{Me-Taz})_2(\text{OAc})_2]_\infty$ ( <b>1c</b> ) in $\text{DMSO-d}_6$                       |     |
| Figure S5.  | $^1\text{H-NMR}$ of $[\text{Hg}_2(\text{Ph-Taz})_2(\text{Cl})_2]_\infty$ ( <b>2a</b> ) in $\text{DMSO-d}_6$                        |     |
| Figure S6.  | $^1\text{H-NMR}$ of $[\text{Hg}_2(\text{Py-Taz})_2(\text{Cl})_2]_\infty$ ( <b>2b</b> ) in $\text{DMSO-d}_6$                        |     |
| Figure S7.  | $^1\text{H-NMR}$ of $[\text{Hg}_2(\text{Me-Taz})_2(\text{Cl})_2]_\infty$ ( <b>2c</b> ) in $\text{DMSO-d}_6$                        |     |
| Figure S8.  | $^1\text{H-NMR}$ of $[(\text{Ph-Taz-Me})_2\text{Hg}][\text{BF}_4]_2$ ( <b>3a</b> ) in $\text{CD}_3\text{CN}$                       |     |
| Figure S9.  | $^{13}\text{C-NMR}$ of $[\text{Hg}_2(\text{Ph-Taz})_2(\text{OAc})_2]_\infty$ ( <b>1a</b> ) in $\text{DMSO-d}_6$                    |     |
| Figure S10. | $^{13}\text{C-NMR}$ of $[\text{Hg}_2(\text{Py-Taz})_2(\text{OAc})_2]_\infty$ ( <b>1b</b> ) in $\text{DMSO-d}_6$                    |     |
| Figure S11. | $^{13}\text{C-NMR}$ of $[\text{Hg}_2(\text{Me-Taz})_2(\text{OAc})_2]_\infty$ ( <b>1c</b> ) in $\text{DMSO-d}_6$                    |     |
| Figure S12. | $^{13}\text{C-NMR}$ of $[\text{Hg}_2(\text{Ph-Taz})_2(\text{Cl})_2]_\infty$ ( <b>2a</b> ) in $\text{DMSO-d}_6$                     |     |
| Figure S13. | $^{13}\text{C-NMR}$ of $[\text{Hg}_2(\text{Py-Taz})_2(\text{Cl})_2]_\infty$ ( <b>2b</b> ) in $\text{DMSO-d}_6$                     |     |
| Figure S14. | $^{13}\text{C-NMR}$ of $[(\text{Ph-Taz-Me})_2\text{Hg}][\text{BF}_4]_2$ ( <b>3a</b> ) in $\text{CD}_3\text{CN}$                    |     |
| Table S1.   | Crystal data and structure refinement for <b>1a</b>                                                                                | 1pg |
| Table S2.   | Atomic coordinates ( $\times 10^4$ ) and equivalent isotropic displacement parameters ( $\text{\AA}^2 \times 10^3$ ) for <b>1a</b> | 1pg |

|            |                                                                                                                                    |     |
|------------|------------------------------------------------------------------------------------------------------------------------------------|-----|
| Table S3.  | Anisotropic displacement parameters ( $\text{\AA}^2 \times 10^3$ ) for <b>1a</b>                                                   | 1pg |
| Table S4.  | Hydrogen coordinates ( $\times 10^4$ ) and isotropic displacement parameters ( $\text{\AA}^2 \times 10^3$ ) for <b>1a</b>          | 1pg |
| Table S5.  | Bond lengths [ $\text{\AA}$ ] and angles [ $^\circ$ ] for <b>1a</b>                                                                | 1pg |
| Table S6.  | Crystal data and structure refinement for <b>2b</b>                                                                                | 1pg |
| Table S7.  | Atomic coordinates ( $\times 10^4$ ) and equivalent isotropic displacement parameters ( $\text{\AA}^2 \times 10^3$ ) for <b>2b</b> | 1pg |
| Table S8.  | Anisotropic displacement parameters ( $\text{\AA}^2 \times 10^3$ ) for <b>2b</b>                                                   | 1pg |
| Table S9.  | Hydrogen coordinates ( $\times 10^4$ ) and isotropic displacement parameters ( $\text{\AA}^2 \times 10^3$ ) for <b>2b</b>          | 1pg |
| Table S10. | Bond lengths [ $\text{\AA}$ ] and angles [ $^\circ$ ] for <b>2b</b>                                                                | 1pg |
| Table S11. | Crystal data and structure refinement for <b>3a</b>                                                                                | 1pg |
| Table S12. | Atomic coordinates ( $\times 10^4$ ) and equivalent isotropic displacement parameters ( $\text{\AA}^2 \times 10^3$ ) for <b>3a</b> | 1pg |
| Table S13. | Anisotropic displacement parameters ( $\text{\AA}^2 \times 10^3$ ) for <b>3a</b>                                                   | 1pg |
| Table S14. | Hydrogen coordinates ( $\times 10^4$ ) and isotropic displacement parameters ( $\text{\AA}^2 \times 10^3$ ) for <b>3a</b>          | 1pg |
| Table S15. | Bond lengths [ $\text{\AA}$ ] and angles [ $^\circ$ ] for <b>3a</b>                                                                | 2pg |

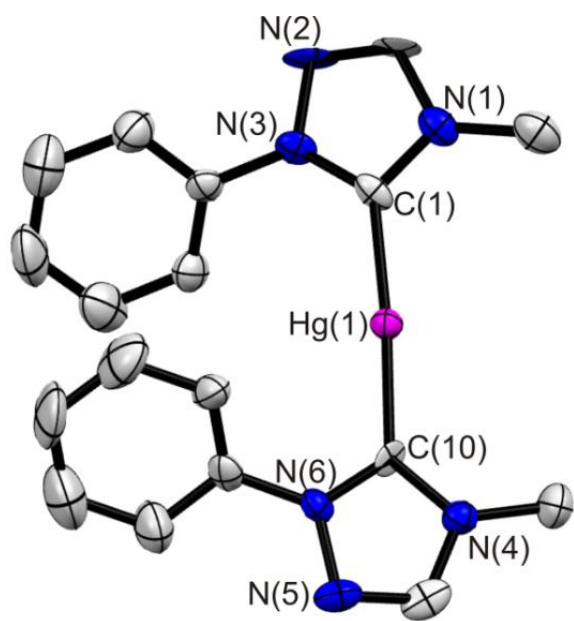

Figure S1: ORTEP of **3a**, depicted with 50% polarizability ellipsoids with hydrogen atoms and counter ions omitted for clarity.

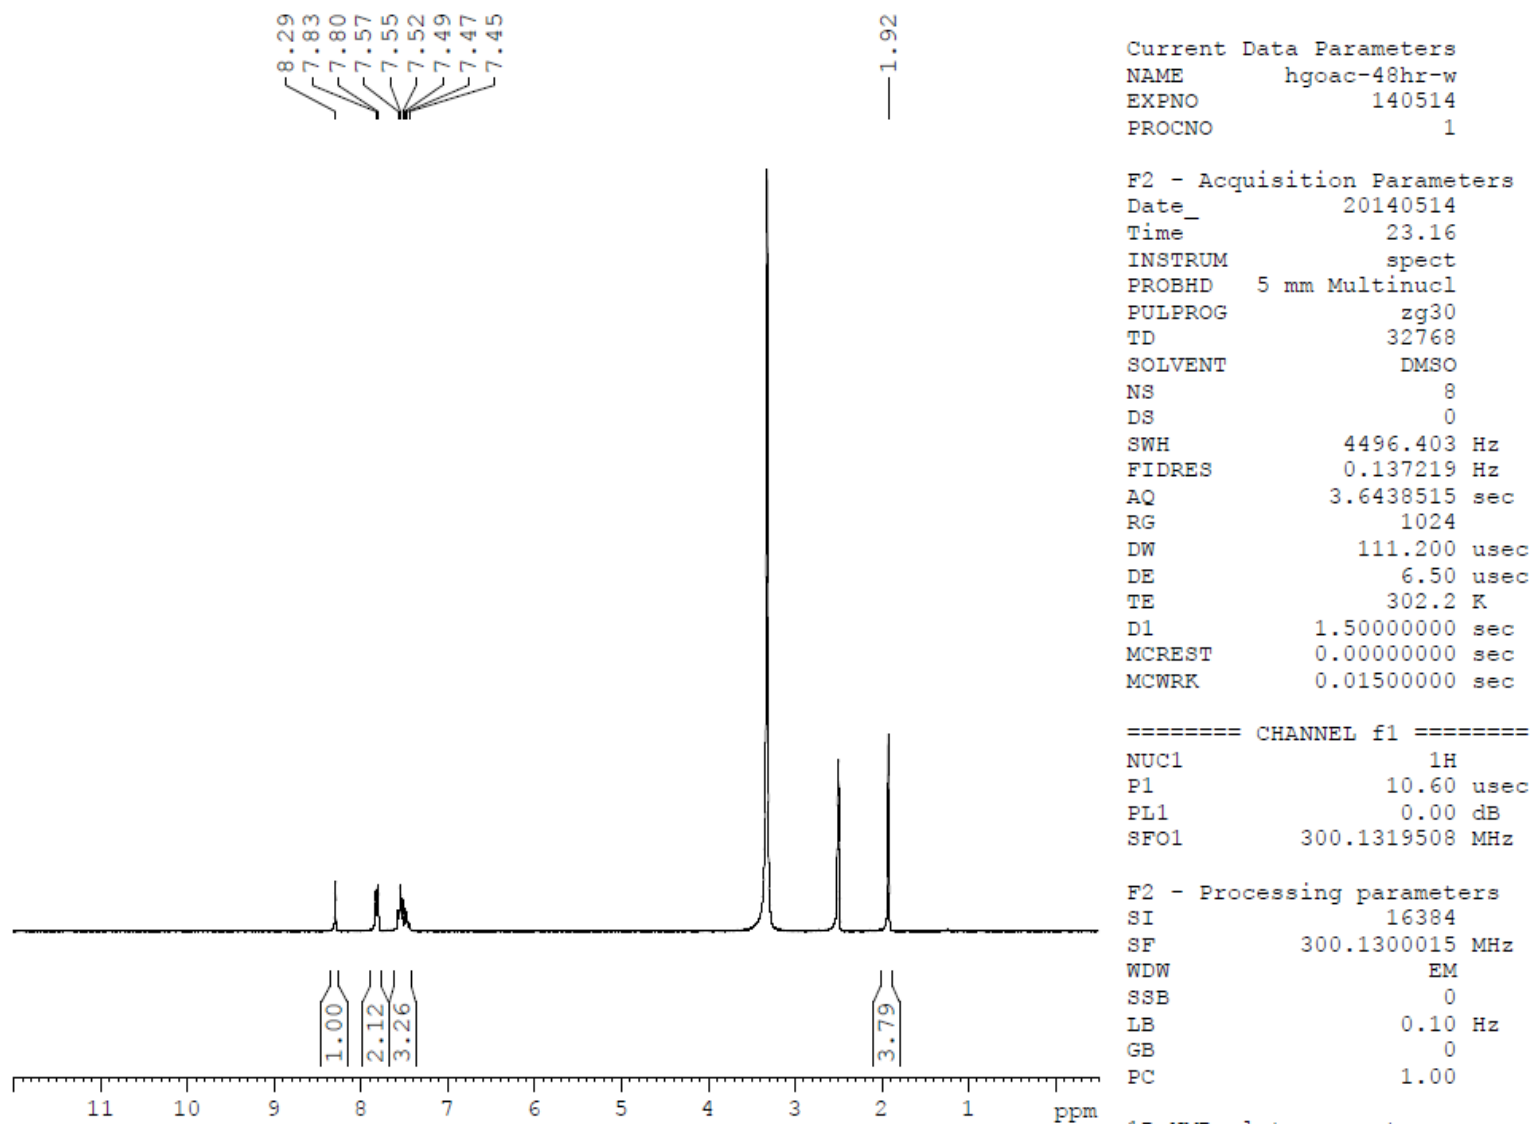

Figure S2:  $^1\text{H-NMR}$  of  $[\text{Hg}_2(\text{Ph-Taz})_2(\text{OAc})_2]_\infty$  (**1a**) in  $\text{DMSO-d}_6$ .

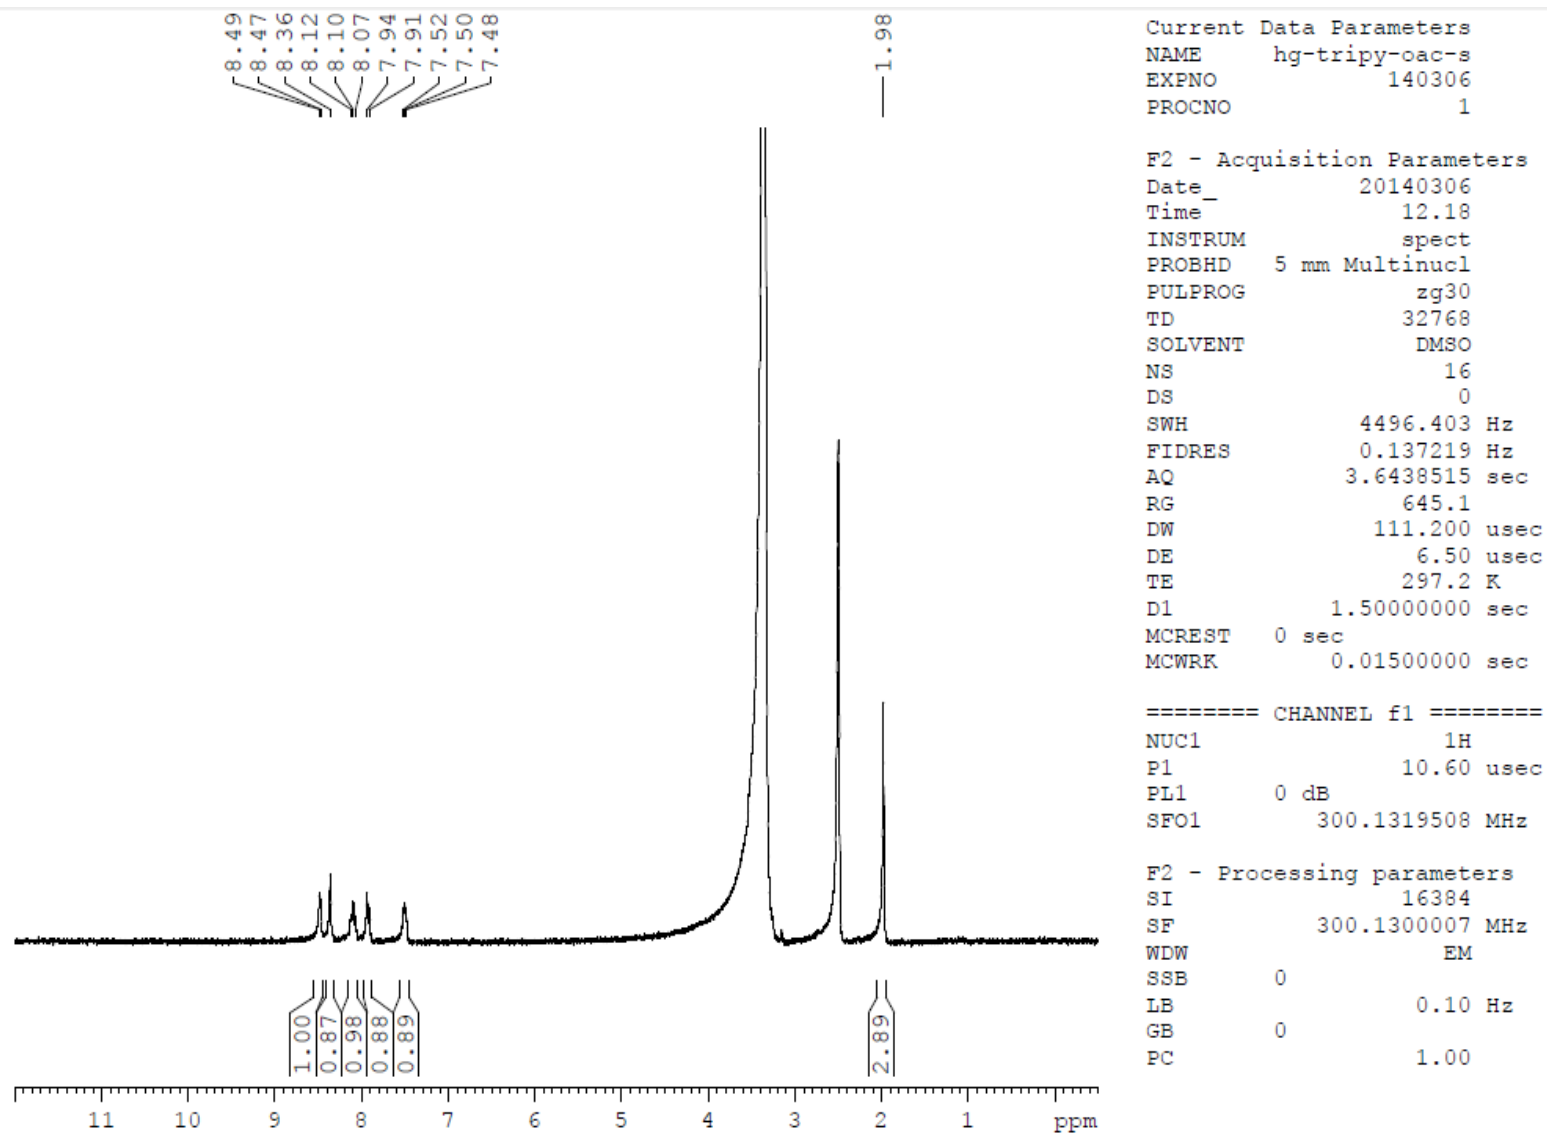

Figure S3:  $^1\text{H-NMR}$  of  $[\text{Hg}_2(\text{Py-Taz})_2(\text{OAc})_2]_\infty$  (**1b**) in  $\text{DMSO-d}_6$ .

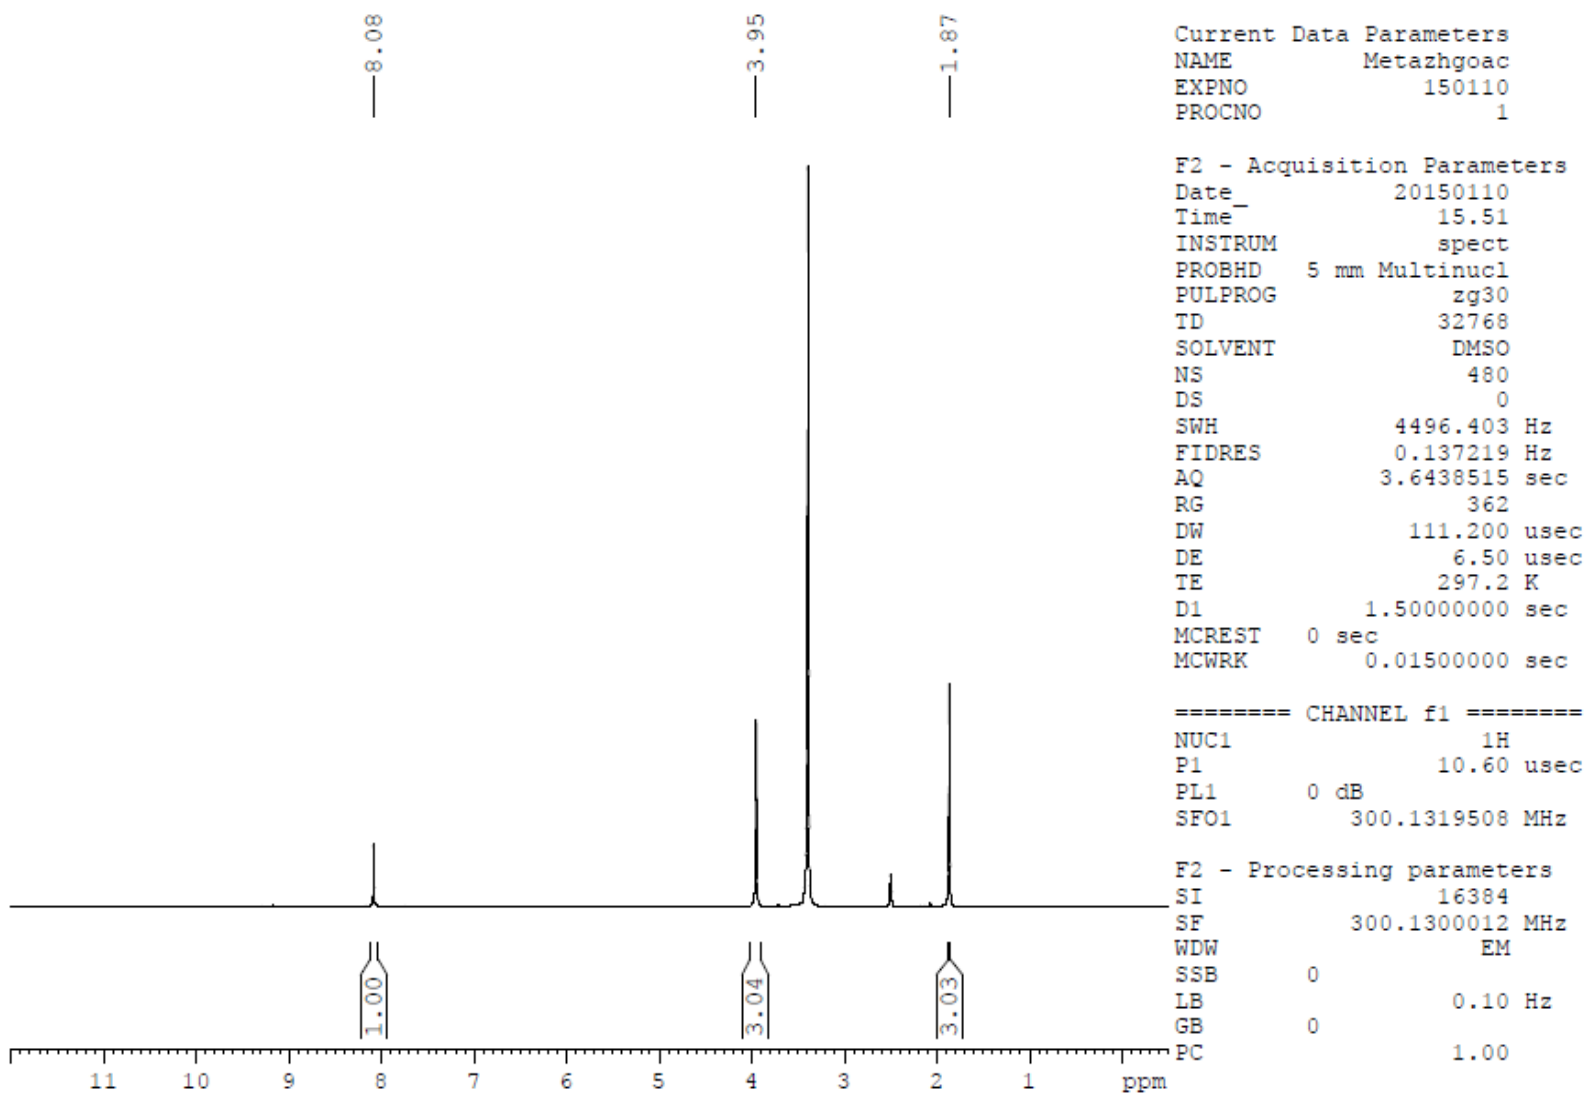

Figure S4:  $^1\text{H-NMR}$  of  $[\text{Hg}_2(\text{Me-Taz})_2(\text{OAc})_2]_\infty$  (**1c**) in  $\text{DMSO-d}_6$ .

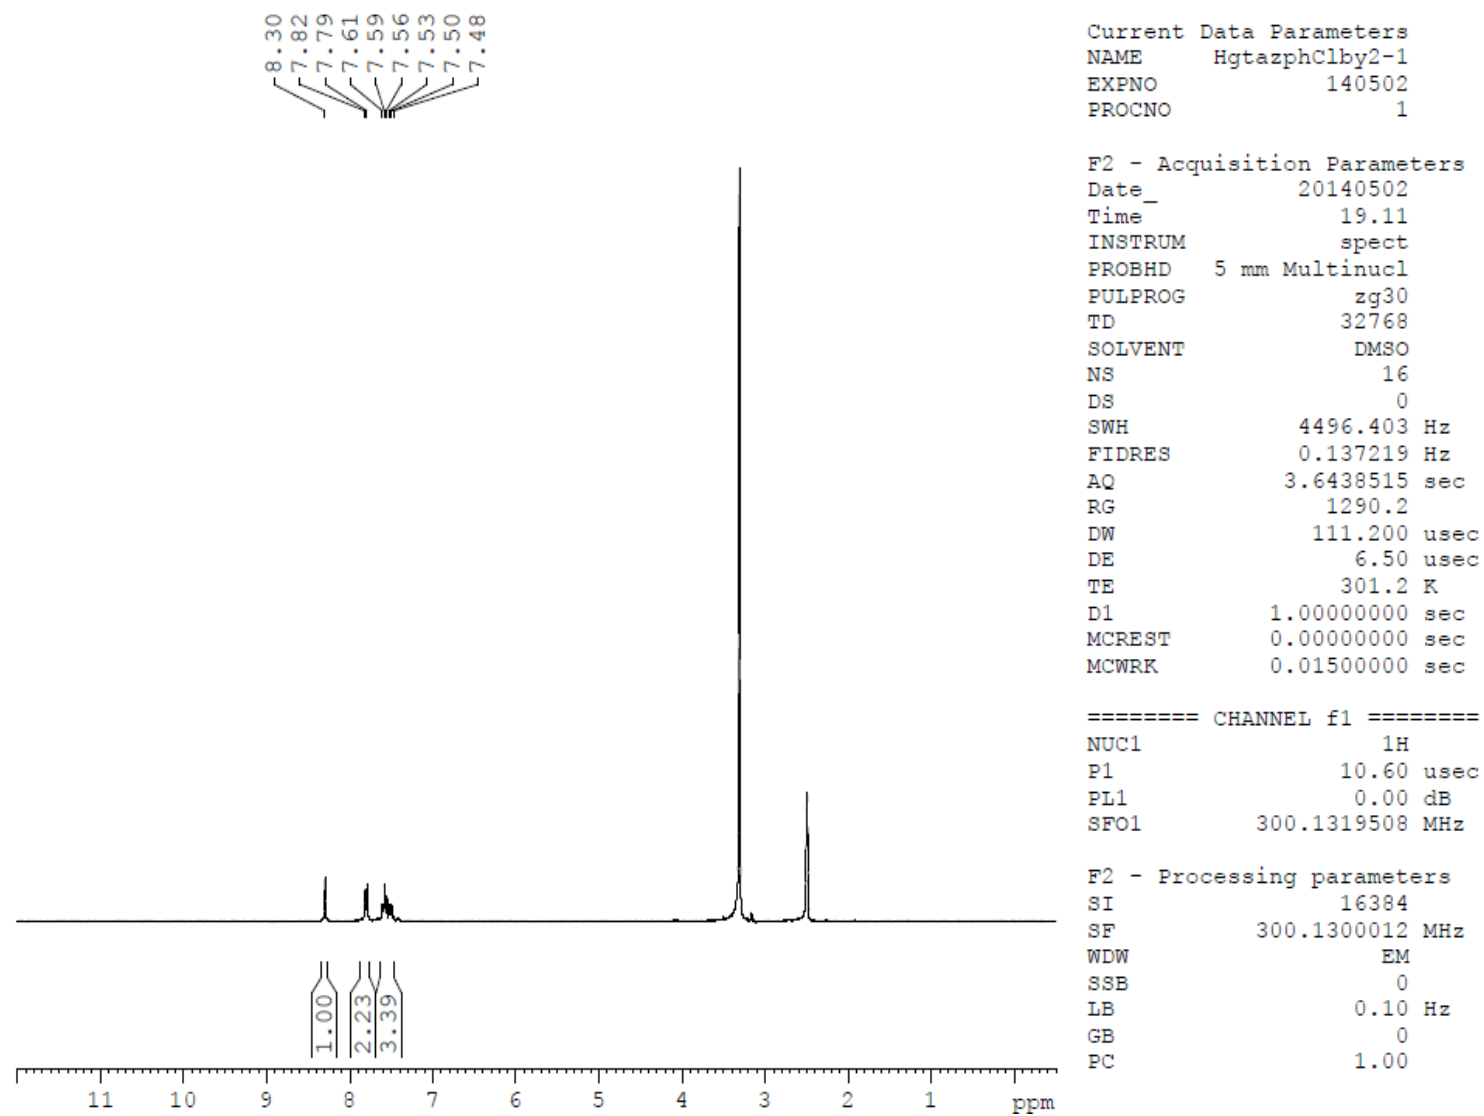

Figure S5:  $^1\text{H-NMR}$  of  $[\text{Hg}_2(\text{Ph-Taz})_2(\text{Cl})_2]_\infty$  (2a) in  $\text{DMSO-d}_6$ .

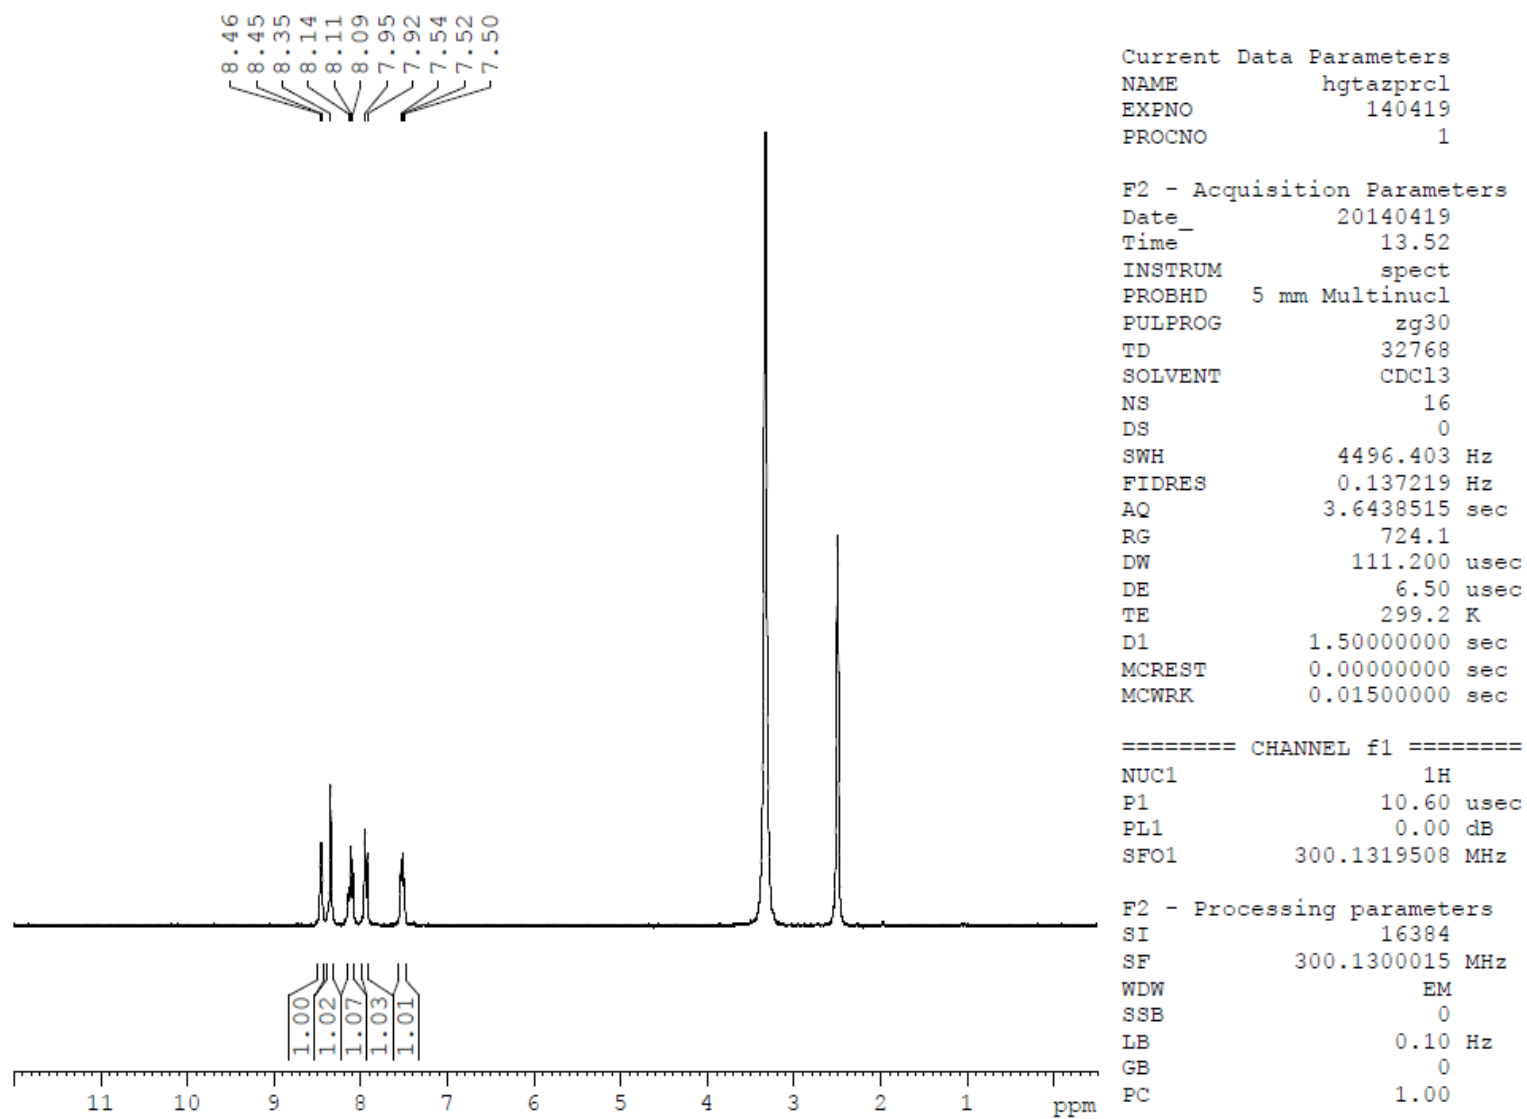

Figure S6:  $^1\text{H-NMR}$  of  $[\text{Hg}_2(\text{Py-Taz})_2(\text{Cl})_2]_\infty$  (**2b**) in  $\text{DMSO-d}_6$ .



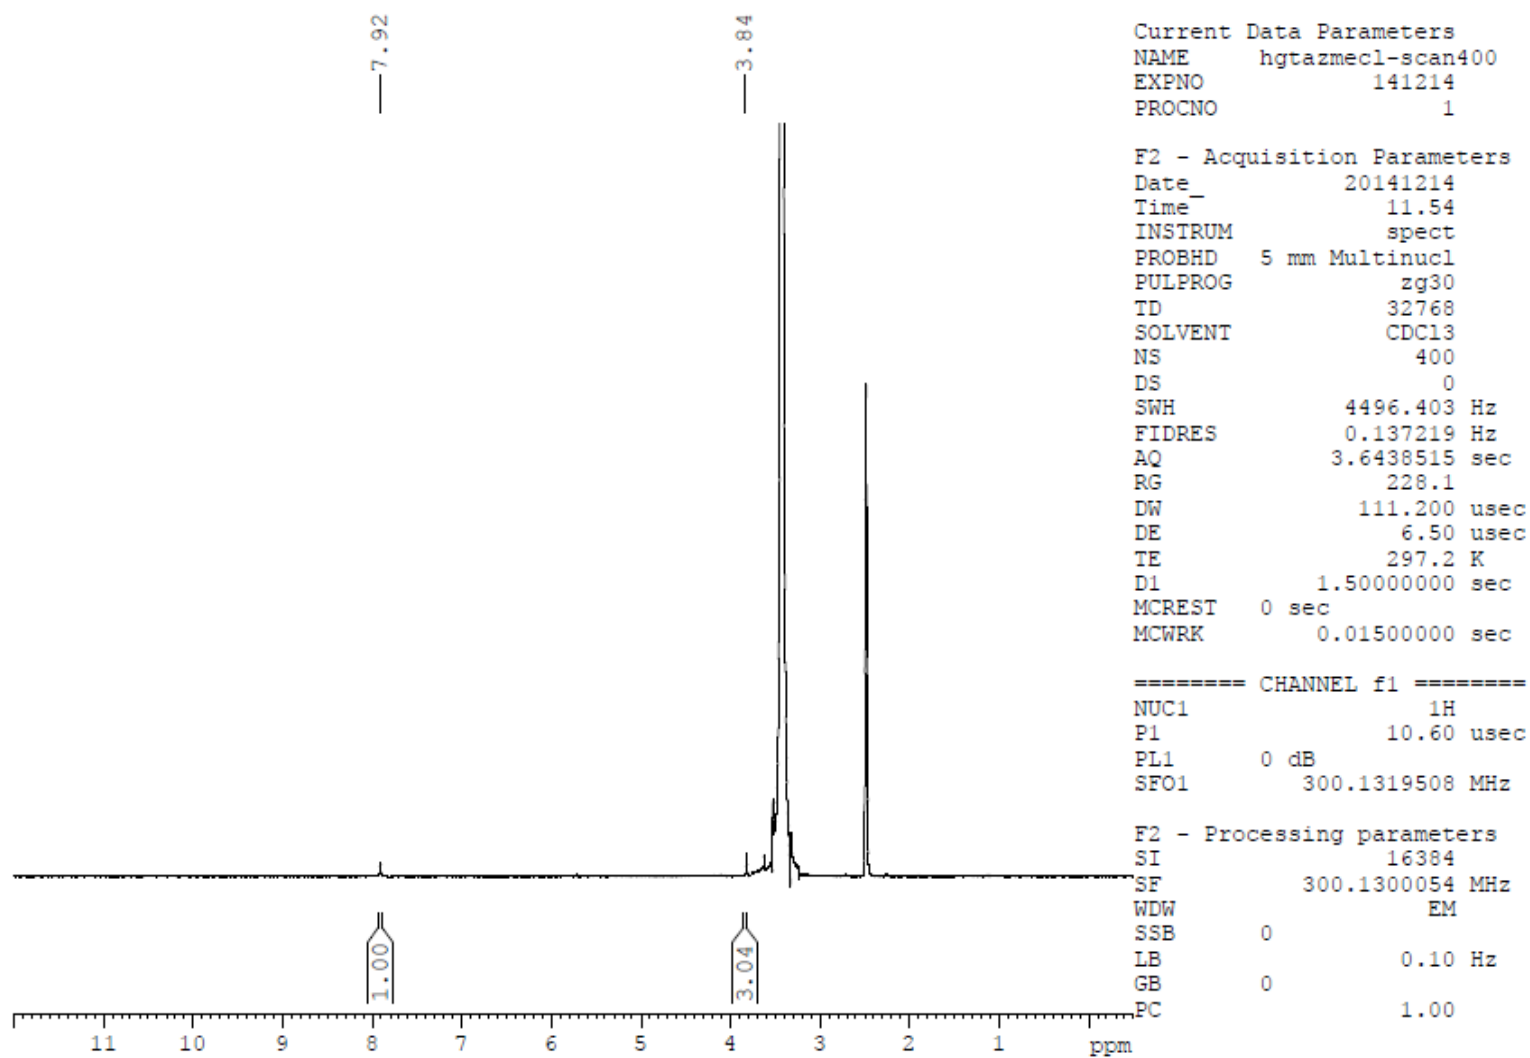

Figure S7:  $^1\text{H-NMR}$  of  $[\text{Hg}_2(\text{Me-Taz})_2(\text{Cl})_2]_\infty$  (2c) in  $\text{DMSO-d}_6$ .

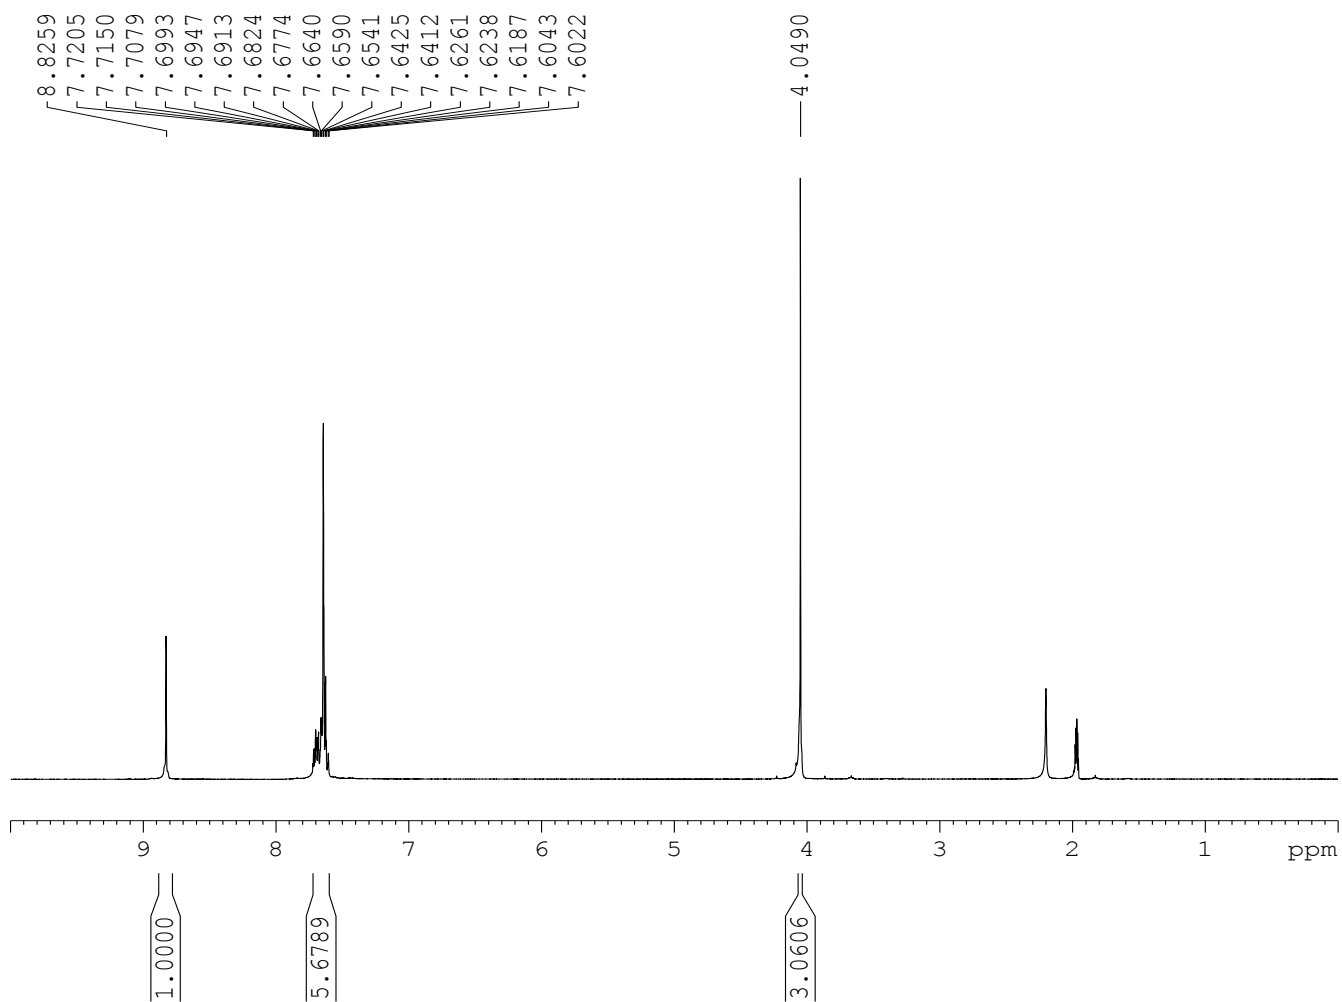

Current Data Parameters  
 NAME 20151106 tea triazole 1106  
 EXPNO 2015110601  
 PROCNO 1

F2 - Acquisition Parameters  
 Date\_ 20151106  
 Time 15.55  
 INSTRUM spect  
 PROBHD 5 mm QNP 1H/13  
 PULPROG zg30  
 TD 32768  
 SOLVENT CD3CN  
 NS 25  
 DS 0  
 SWH 6393.862 Hz  
 FIDRES 0.195125 Hz  
 AQ 2.5625076 sec  
 RG 512  
 DW 78.200 usec  
 DE 6.00 usec  
 TE 297.6 K  
 D1 2.0000000 sec  
 TD0 1

===== CHANNEL f1 =====  
 NUC1 1H  
 P1 11.05 usec  
 PL1 -3.00 dB  
 SFO1 400.1324008 MHz

F2 - Processing parameters  
 SI 16384  
 SF 400.1300000 MHz  
 WDW EM  
 SSB 0  
 LB 0 Hz  
 GB 0  
 PC 1.00

Figure S8:  $^1\text{H-NMR}$  of  $[(\text{Ph-Taz-Me})_2\text{Hg}][\text{BF}_4]_2$  (**3a**) in  $\text{CD}_3\text{CN}$ .

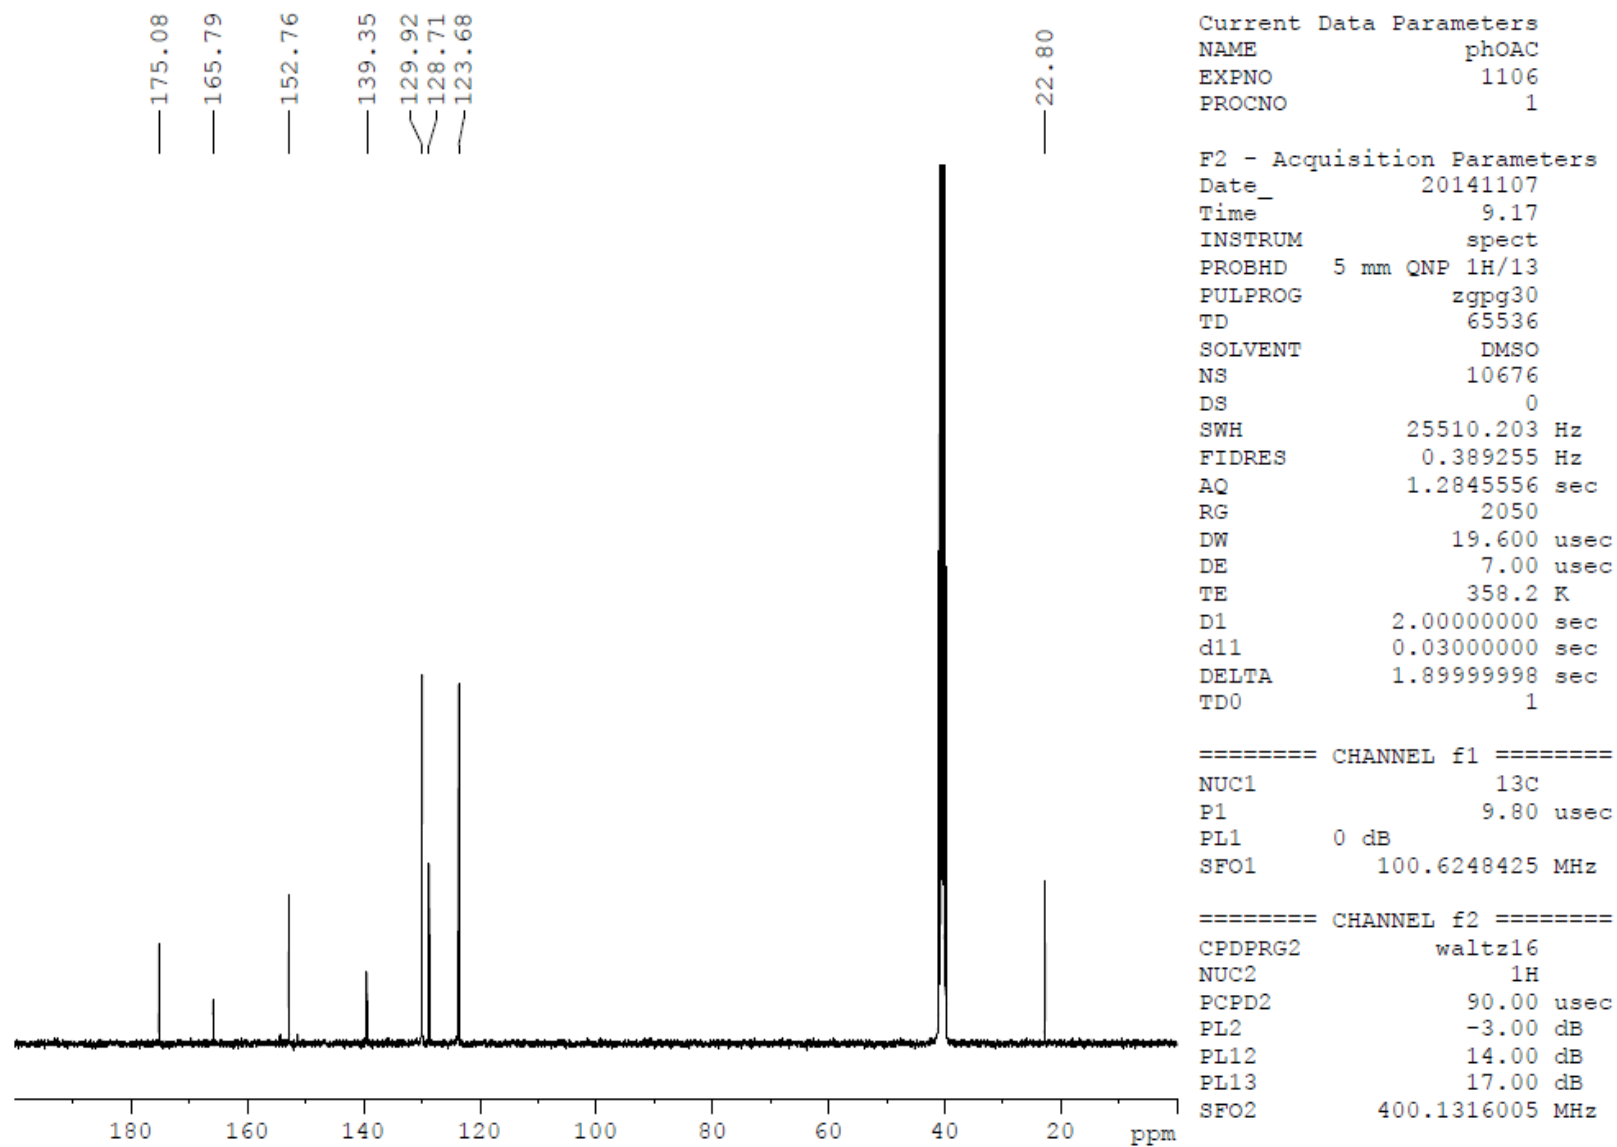

Figure S9:  $^{13}\text{C}$ -NMR of  $[\text{Hg}_2(\text{Ph-Taz})_2(\text{OAc})_2]_\infty$  (**1a**) in  $\text{DMSO-d}_6$ .

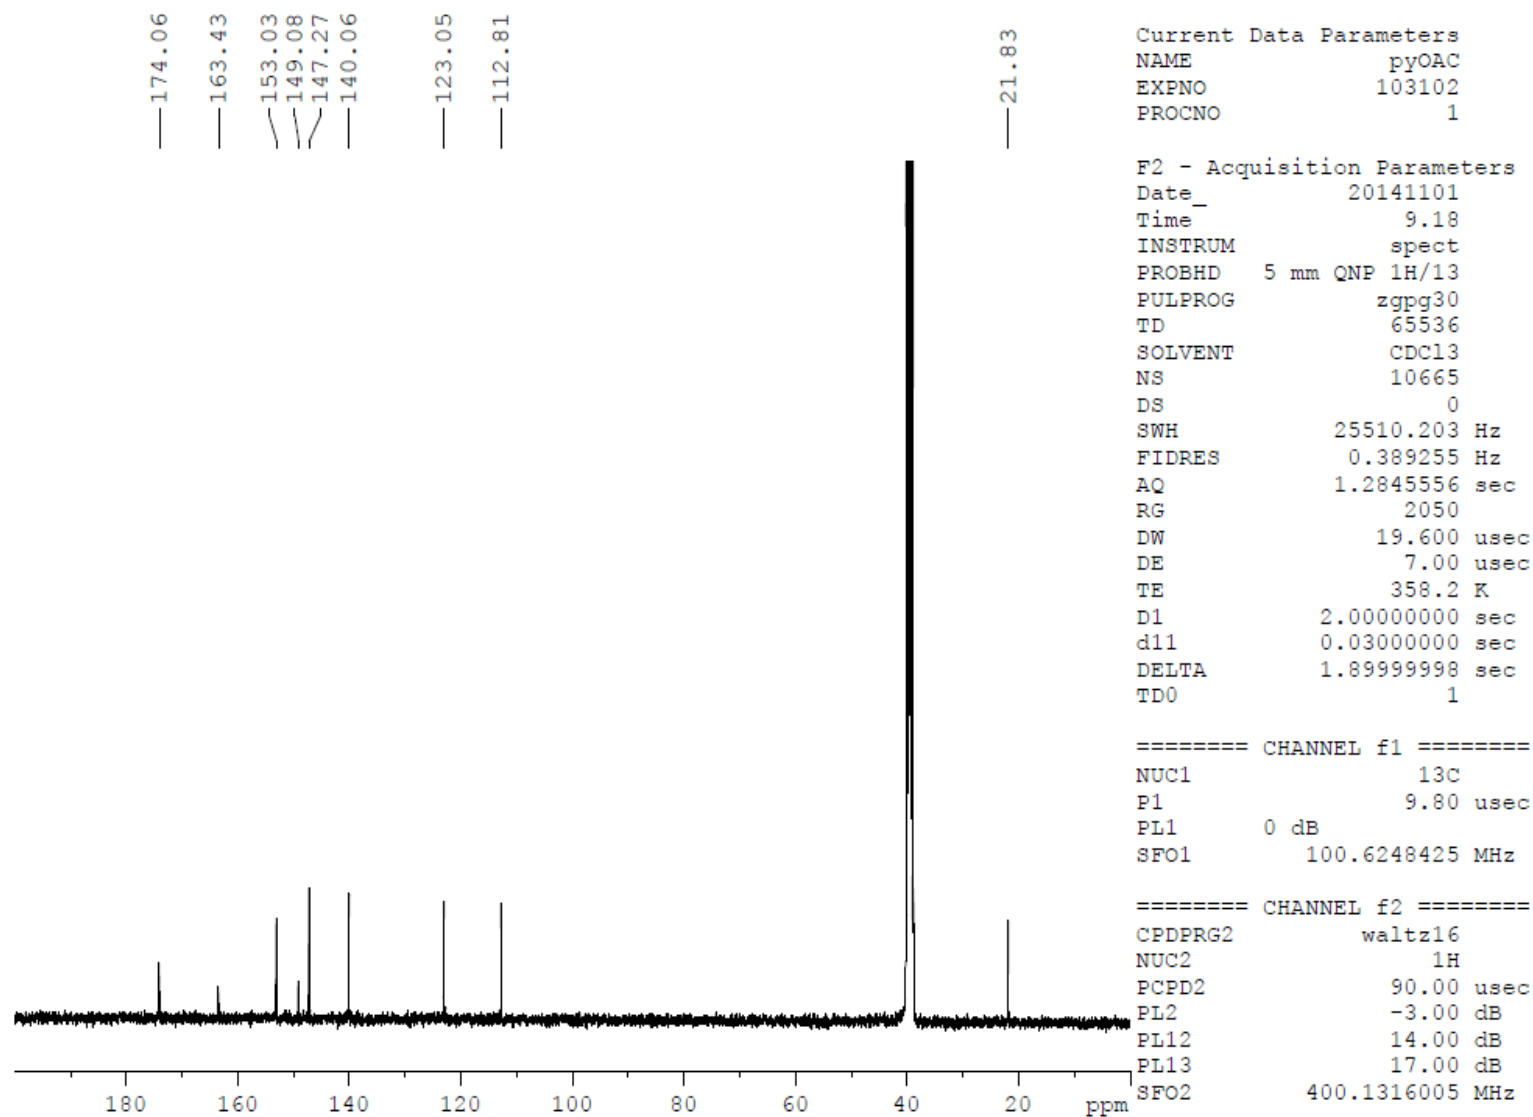

Figure S10:  $^{13}\text{C}$ -NMR of  $[\text{Hg}_2(\text{Py-Taz})_2(\text{OAc})_2]_\infty$  (**1b**) in  $\text{DMSO-d}_6$ .

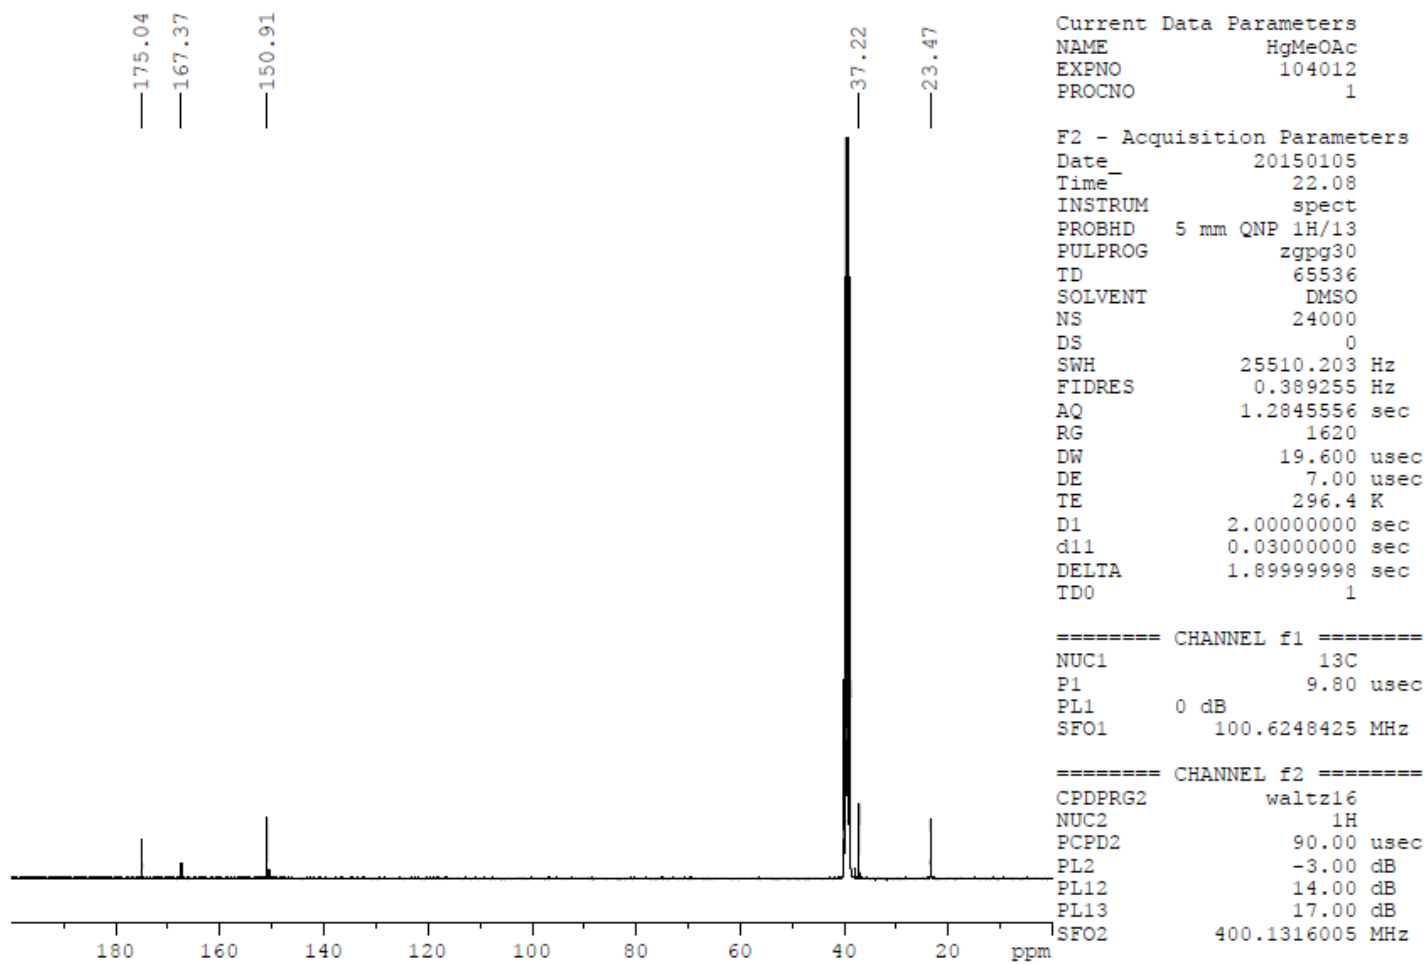

Figure S11:  $^{13}\text{C}$ -NMR of  $[\text{Hg}_2(\text{Me-Taz})_2(\text{OAc})_2]_\infty$  (**1c**) in  $\text{DMSO-d}_6$ .

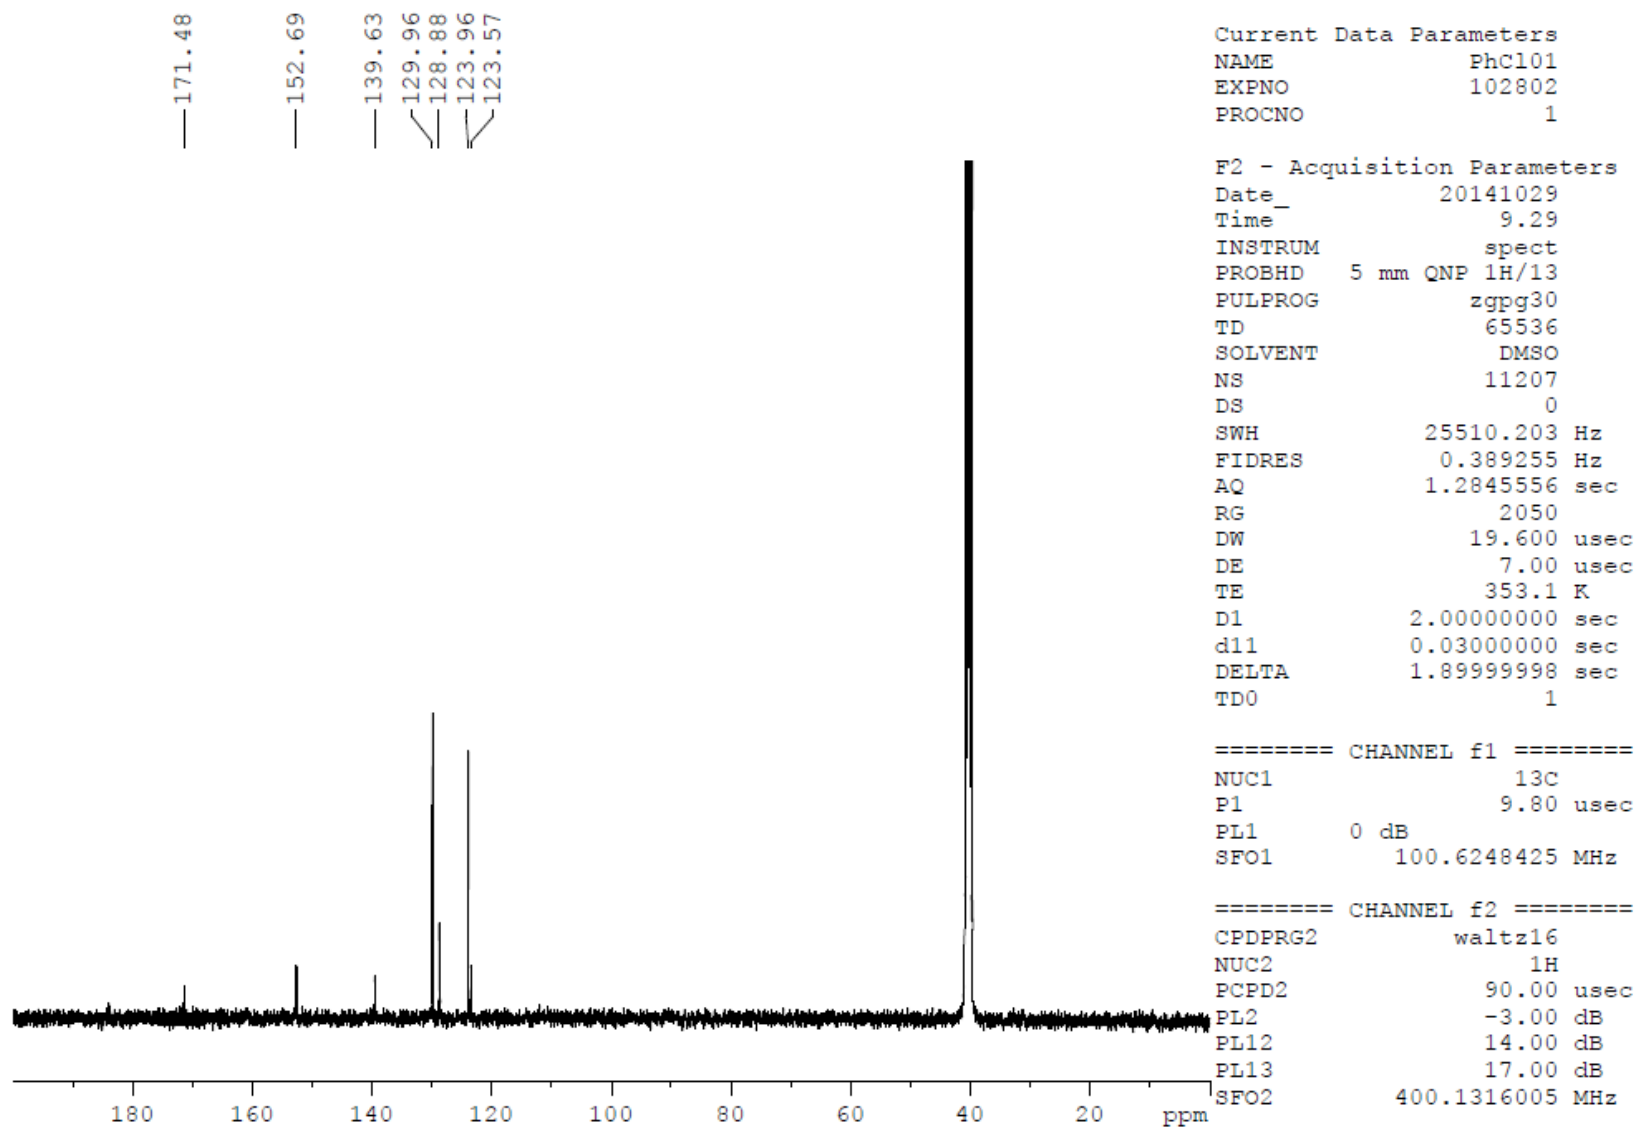

Figure S12:  $^{13}\text{C}$ -NMR of  $[\text{Hg}_2(\text{Ph-Taz})_2(\text{Cl})_2]_\infty$  (**2a**) in  $\text{DMSO-d}_6$ .

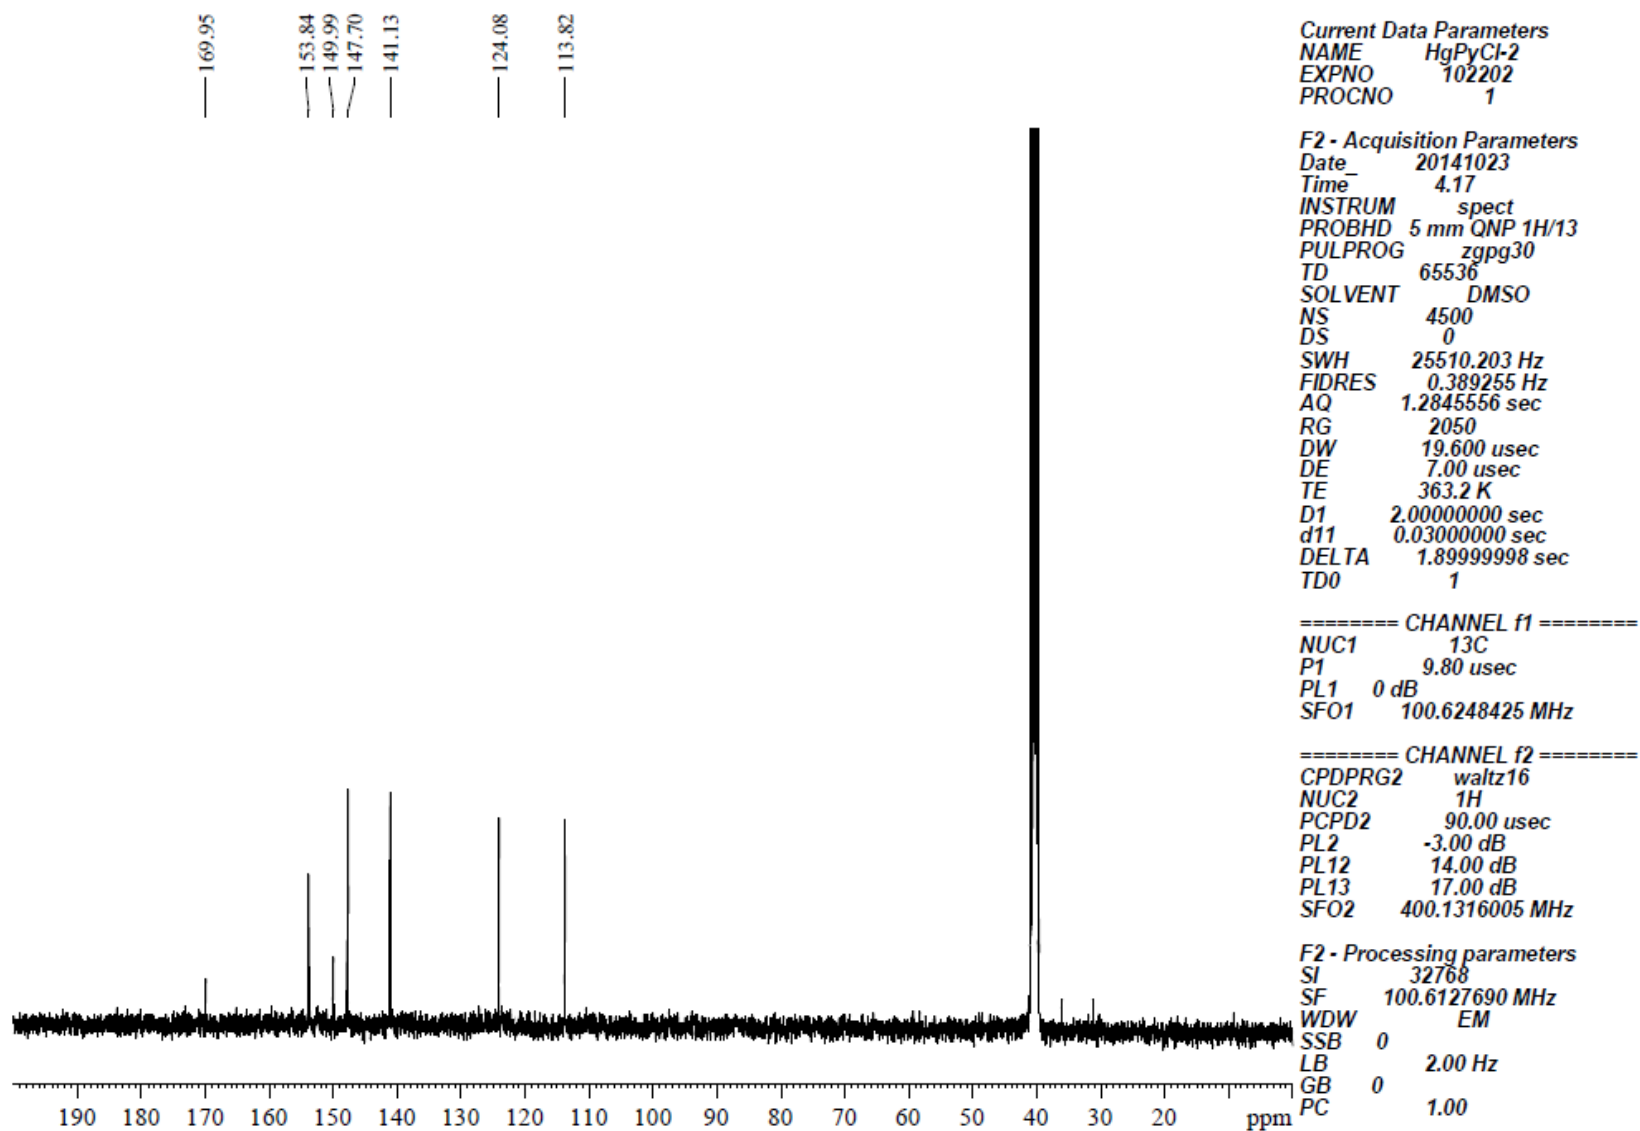

Figure S13:  $^{13}\text{C}$ -NMR of  $[\text{Hg}_2(\text{Py-Taz})_2(\text{Cl})_2]_\infty$  (**2b**) in  $\text{DMSO-d}_6$ .

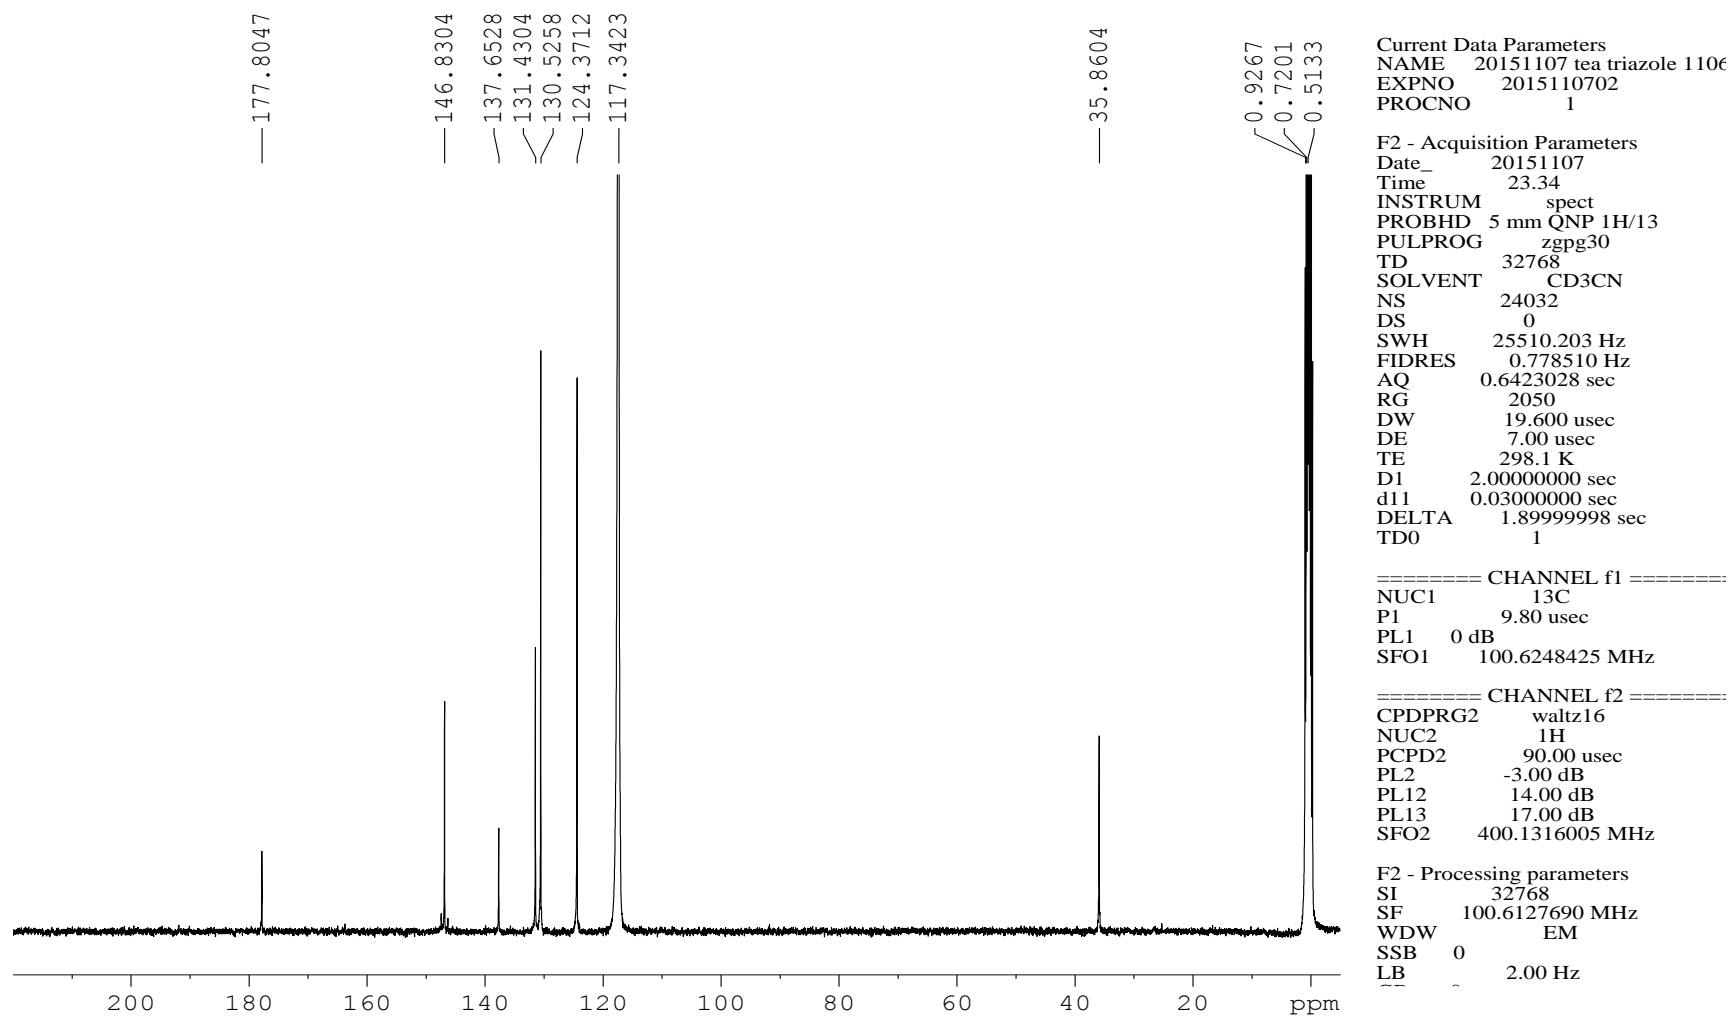

Figure S14:  $^{13}\text{C}$ -NMR of  $[(\text{Ph-Taz-Me})_2\text{Hg}][\text{BF}_4]_2$  (**3a**) in  $\text{CD}_3\text{CN}$ .



Table S1. Crystal data and structure refinement for **1a**.

|                                   |                                                                |                                                     |
|-----------------------------------|----------------------------------------------------------------|-----------------------------------------------------|
| Empirical formula                 | C <sub>10</sub> H <sub>9</sub> HgN <sub>3</sub> O <sub>2</sub> |                                                     |
| Formula weight                    | 403.79                                                         |                                                     |
| Temperature                       | 293(2) K                                                       |                                                     |
| Wavelength                        | 0.71073 Å                                                      |                                                     |
| Crystal system                    | Triclinic                                                      |                                                     |
| Space group                       | P(-)1                                                          |                                                     |
| Unit cell dimensions              | a = 4.3353(9) Å<br>b = 10.658(2) Å<br>c = 12.488(3) Å          | α = 106.28(3)°.<br>β = 93.90(3)°.<br>γ = 95.40(3)°. |
| Volume                            | 548.7(2) Å <sup>3</sup>                                        |                                                     |
| Z                                 | 2                                                              |                                                     |
| Density (calculated)              | 2.444 Mg/m <sup>3</sup>                                        |                                                     |
| Absorption coefficient            | 14.012 mm <sup>-1</sup>                                        |                                                     |
| F(000)                            | 372                                                            |                                                     |
| Crystal size                      | 0.10 x 0.08 x 0.05 mm <sup>3</sup>                             |                                                     |
| Theta range for data collection   | 1.707 to 26.468°.                                              |                                                     |
| Index ranges                      | -5<=h<=5, -13<=k<=13, -15<=l<=15                               |                                                     |
| Reflections collected             | 5327                                                           |                                                     |
| Independent reflections           | 2271 [R(int) = 0.0301]                                         |                                                     |
| Completeness to theta = 25.242°   | 99.9 %                                                         |                                                     |
| Absorption correction             | multi-scan SADABS                                              |                                                     |
| Max. and min. transmission        | 0.7454 and 0.4403                                              |                                                     |
| Refinement method                 | Full-matrix least-squares on F <sup>2</sup>                    |                                                     |
| Data / restraints / parameters    | 2271 / 0 / 146                                                 |                                                     |
| Goodness-of-fit on F <sup>2</sup> | 0.983                                                          |                                                     |
| Final R indices [I>2sigma(I)]     | R1 = 0.0273, wR2 = 0.0607                                      |                                                     |
| R indices (all data)              | R1 = 0.0369, wR2 = 0.0645                                      |                                                     |
| Largest diff. peak and hole       | 1.297 and -1.053 e.Å <sup>-3</sup>                             |                                                     |

$$^a R_1 = \frac{\sum ||F_o| - |F_c||}{\sum |F_o|}$$

$$^b wR_2 = \{\sum w(F_o^2 - F_c^2)^2 / \sum w(F_o^2)^2\}^{1/2}$$

Table S2. Atomic coordinates ( $\times 10^4$ ) and equivalent isotropic displacement parameters ( $\text{\AA}^2 \times 10^3$ ) for **1a**.

| Atom  | x         | y       | z       | U(eq) <sup>a</sup> |
|-------|-----------|---------|---------|--------------------|
| C(1)  | 3198(15)  | 3667(5) | 3551(5) | 42(14)             |
| C(2)  | 4650(2)   | 1954(6) | 3847(6) | 62(2)              |
| C(3)  | 1339(15)  | 2612(6) | 1509(5) | 44(14)             |
| C(4)  | -888(16)  | 1614(7) | 937(5)  | 55(17)             |
| C(5)  | -2089(19) | 1565(8) | -141(6) | 70(2)              |
| C(6)  | -1029(19) | 2519(8) | -612(6) | 65(2)              |
| C(7)  | 1235(19)  | 3516(7) | -20(6)  | 64(2)              |
| C(8)  | 2451(17)  | 3568(7) | 1040(5) | 53(16)             |
| C(9)  | -1419(15) | 7433(6) | 3287(5) | 46(14)             |
| C(10) | -2223(18) | 8794(7) | 3323(7) | 63(19)             |
| Hg    | 2269(6)   | 5561(2) | 3750(2) | 45(10)             |
| N(1)  | 2591(13)  | 2645(5) | 2613(4) | 45(12)             |
| N(2)  | 3527(15)  | 1523(5) | 2810(5) | 58(15)             |
| N(3)  | 4527(15)  | 3245(5) | 4357(4) | 57(15)             |
| O(1)  | 1079(11)  | 7444(4) | 3903(4) | 55(11)             |
| O(2)  | -3045(11) | 6439(4) | 2731(4) | 56(11)             |

<sup>a</sup> U(eq) is defined as one third of the trace of the orthogonalized  $U^{ij}$  tensor.

Table S3. Anisotropic displacement parameters ( $\text{\AA}^2 \times 10^3$ ) for **1a**.

| Atom  | U <sub>11</sub> | U <sub>22</sub> | U <sub>33</sub> | U <sub>12</sub> | U <sub>13</sub> | U <sub>23</sub> |
|-------|-----------------|-----------------|-----------------|-----------------|-----------------|-----------------|
| C(1)  | 61(4)           | 27(3)           | 37(3)           | 3(3)            | 5(3)            | 8(2)            |
| C(2)  | 101(6)          | 37(3)           | 50(4)           | 8(4)            | -14(4)          | 19(3)           |
| C(3)  | 60(4)           | 33(3)           | 34(3)           | 8(3)            | 1(3)            | 5(2)            |
| C(4)  | 63(4)           | 51(4)           | 45(4)           | -1(3)           | -4(3)           | 9(3)            |
| C(5)  | 66(5)           | 74(5)           | 56(4)           | -6(4)           | -11(4)          | 4(4)            |
| C(6)  | 73(5)           | 79(5)           | 43(4)           | 14(4)           | -7(3)           | 18(4)           |
| C(7)  | 86(6)           | 60(4)           | 51(4)           | 7(4)            | 4(4)            | 27(4)           |
| C(8)  | 61(4)           | 53(4)           | 46(4)           | 0(3)            | 3(3)            | 17(3)           |
| C(9)  | 53(4)           | 38(3)           | 47(3)           | 5(3)            | 3(3)            | 14(3)           |
| C(10) | 61(5)           | 47(4)           | 81(5)           | 9(3)            | -4(4)           | 23(4)           |
| Hg    | 58(17)          | 30(13)          | 45(15)          | 4(10)           | -4(10)          | 11(9)           |
| N(1)  | 66(3)           | 32(2)           | 36(3)           | 4(2)            | -3(2)           | 11(2)           |
| N(2)  | 91(5)           | 31(3)           | 49(3)           | 11(3)           | -8(3)           | 9(2)            |
| N(3)  | 95(5)           | 31(3)           | 41(3)           | 3(3)            | -12(3)          | 10(2)           |
| O(1)  | 55(3)           | 35(2)           | 69(3)           | 7(2)            | -6(2)           | 10(2)           |
| O(2)  | 61(3)           | 44(3)           | 59(3)           | 2(2)            | 1(2)            | 12(2)           |

Table S4. Hydrogen coordinates ( $\times 10^4$ ) and isotropic displacement parameters ( $\text{\AA}^2 \times 10^3$ ) for **1a**.

---

| Atom   | x     | y    | z     | U(eq) |
|--------|-------|------|-------|-------|
| H(2)   | 5495  | 1407 | 4223  | 75    |
| H(4)   | -1599 | 971  | 1263  | 65    |
| H(5)   | -3605 | 888  | -538  | 84    |
| H(6)   | -1832 | 2495 | -1329 | 78    |
| H(7)   | 1949  | 4162 | -342  | 76    |
| H(8)   | 3995  | 4236 | 1433  | 64    |
| H(10A) | -2491 | 8865 | 2574  | 94    |
| H(10B) | -568  | 9440 | 3749  | 94    |
| H(10C) | -4118 | 8940 | 3670  | 94    |

---

Table S5. Bond lengths [ $\text{\AA}$ ] and angles [ $^\circ$ ] for **1a**.

---

| Bond lengths   |           |                 |           |
|----------------|-----------|-----------------|-----------|
| C(1)-N(3)      | 1.330(8)  | C(6)-C(7)       | 1.379(11) |
| C(1)-N(1)      | 1.348(7)  | C(7)-C(8)       | 1.376(9)  |
| C(1)-Hg        | 2.046(6)  | C(9)-O(2)       | 1.217(8)  |
| C(2)-N(2)      | 1.290(8)  | C(9)-O(1)       | 1.282(8)  |
| C(2)-N(3)      | 1.353(8)  | C(9)-C(10)      | 1.513(9)  |
| C(3)-C(4)      | 1.364(9)  | Hg-O(1)         | 2.079(4)  |
| C(3)-C(8)      | 1.375(9)  | Hg-N(3)         | 2.583(5)  |
| C(3)-N(1)      | 1.437(7)  | N(1)-N(2)       | 1.377(7)  |
| C(4)-C(5)      | 1.395(10) | N(3)-Hg         | 2.583(5)  |
| C(5)-C(6)      | 1.370(11) |                 |           |
| Angles         |           |                 |           |
| N(3)-C(1)-N(1) | 108.5(5)  | O(2)-C(9)-C(10) | 122.2(6)  |
| N(3)-C(1)-Hg   | 124.4(4)  | O(1)-C(9)-C(10) | 113.4(6)  |
| N(1)-C(1)-Hg   | 127.1(4)  | C(1)-Hg-O(1)    | 176.8(2)  |
| N(2)-C(2)-N(3) | 116.3(6)  | C(1)-Hg-N(3)    | 100.8(2)  |
| C(4)-C(3)-C(8) | 121.3(6)  | O(1)-Hg-N(3)    | 81.92(18) |
| C(4)-C(3)-N(1) | 119.1(6)  | C(1)-N(1)-N(2)  | 110.1(5)  |
| C(8)-C(3)-N(1) | 119.5(5)  | C(1)-N(1)-C(3)  | 129.8(5)  |
| C(3)-C(4)-C(5) | 119.5(7)  | N(2)-N(1)-C(3)  | 120.0(5)  |
| C(6)-C(5)-C(4) | 119.8(7)  | C(2)-N(2)-N(1)  | 101.8(5)  |
| C(5)-C(6)-C(7) | 119.7(7)  | C(1)-N(3)-C(2)  | 103.3(5)  |
| C(8)-C(7)-C(6) | 121.0(7)  | C(1)-N(3)-Hg    | 133.1(4)  |
| C(3)-C(8)-C(7) | 118.7(7)  | C(2)-N(3)-Hg    | 121.4(4)  |
| O(2)-C(9)-O(1) | 124.4(6)  | C(9)-O(1)-Hg    | 112.3(4)  |

---

Symmetry transformations used to generate equivalent atoms:

Table S6. Crystal data and structure refinement for **2b**.

|                                   |                                                                                |                      |
|-----------------------------------|--------------------------------------------------------------------------------|----------------------|
| Empirical formula                 | C <sub>14</sub> H <sub>10</sub> Cl <sub>2</sub> Hg <sub>2</sub> N <sub>8</sub> |                      |
| Formula weight                    | 762.38                                                                         |                      |
| Temperature                       | 296(2) K                                                                       |                      |
| Wavelength                        | 0.71073 Å                                                                      |                      |
| Crystal system                    | Monoclinic                                                                     |                      |
| Space group                       | P2(1)/n                                                                        |                      |
| Unit cell dimensions              | a = 13.1710(18) Å                                                              | α = 90°.             |
|                                   | b = 4.5399(5) Å                                                                | β = 93.807(11) (3)°. |
|                                   | c = 14.990(2) Å                                                                | γ = 90°.             |
| Volume                            | 894.3(2) Å <sup>3</sup>                                                        |                      |
| Z                                 | 2                                                                              |                      |
| Density (calculated)              | 2.831 Mg/m <sup>3</sup>                                                        |                      |
| Absorption coefficient            | 17.461 mm <sup>-1</sup>                                                        |                      |
| F(000)                            | 688                                                                            |                      |
| Crystal size                      | 079 x 0.03 x 0.02 mm <sup>3</sup>                                              |                      |
| Theta range for data collection   | 3.100 to 24.995°.                                                              |                      |
| Index ranges                      | -15 ≤ h ≤ 15, -5 ≤ k ≤ 5, -16 ≤ l ≤ 17                                         |                      |
| Reflections collected             | 5762                                                                           |                      |
| Independent reflections           | 1571 [R(int) = 0.0308]                                                         |                      |
| Completeness to theta = 24.996°   | 99.4 %                                                                         |                      |
| Absorption correction             | multi-scan SADABS                                                              |                      |
| Max. and min. transmission        | 0.5574 and 0.2265                                                              |                      |
| Refinement method                 | Full-matrix least-squares on F <sup>2</sup>                                    |                      |
| Data / restraints / parameters    | 1571/ 0 / 118                                                                  |                      |
| Goodness-of-fit on F <sup>2</sup> | 1.369                                                                          |                      |
| Final R indices [I > 2σ(I)]       | R1 = 0.0571, wR2 = 0.1717                                                      |                      |
| R indices (all data)              | R1 = 0.0633, wR2 = 0.1738                                                      |                      |
| Largest diff. peak and hole       | 2.752 and -2.013 e.Å <sup>-3</sup>                                             |                      |

$$^a R_1 = \frac{\sum ||F_o| - |F_c||}{\sum |F_o|}$$

$$^b wR_2 = \{\sum w(F_o^2 - F_c^2)^2 / \sum w(F_o^2)^2\}^{1/2}$$

Table S7. Atomic coordinates ( $\times 10^4$ ) and equivalent isotropic displacement parameters ( $\text{\AA}^2 \times 10^3$ ) for **2b**

| Atom | x        | y        | z        | U(eq) <sup>a</sup> |
|------|----------|----------|----------|--------------------|
| C(1) | 3600(17) | 390(6)   | 7930(16) | 37(5)              |
| C(2) | 3627(19) | -180(6)  | 9351(15) | 42(6)              |
| C(3) | 5004(18) | 4040(6)  | 7941(15) | 36(5)              |
| C(4) | 5660(2)  | 5540(5)  | 8468(15) | 41(6)              |
| C(5) | 6350(2)  | 7300(7)  | 8054(19) | 51(7)              |
| C(6) | 6300(2)  | 7470(7)  | 7110(2)  | 53(7)              |
| C(7) | 5570(2)  | 5840(6)  | 6655(19) | 47(7)              |
| N(1) | 3148(15) | -1160(5) | 8543(12) | 42(5)              |
| N(2) | 4334(16) | 1790(5)  | 9260(13) | 43(5)              |
| N(3) | 4292(14) | 2150(5)  | 8352(11) | 34(5)              |
| N(4) | 4917(15) | 4090(5)  | 7062(13) | 38(5)              |
| Cl   | 3333(6)  | -580(2)  | 5046(4)  | 62(2)              |
| Hg   | 3360(7)  | 275(2)   | 6560(6)  | 39(3)              |

<sup>a</sup> U(eq) is defined as one third of the trace of the orthogonalized  $U^{ij}$  tensor.

Table S8. Anisotropic displacement parameters ( $\text{\AA}^2 \times 10^3$ ) for **2b**.

| Atom | U <sub>11</sub> | U <sub>22</sub> | U <sub>33</sub> | U <sub>12</sub> | U <sub>13</sub> | U <sub>23</sub> |
|------|-----------------|-----------------|-----------------|-----------------|-----------------|-----------------|
| C(1) | 37(13)          | 37(14)          | 36(13)          | -1(11)          | -2(10)          | 6(11)           |
| C(2) | 50(15)          | 53(16)          | 23(11)          | 2(14)           | -1(10)          | 4(12)           |
| C(3) | 34(12)          | 40(14)          | 33(12)          | 3(11)           | -5(10)          | 10(11)          |
| C(4) | 72(18)          | 29(12)          | 23(11)          | -9(13)          | 4(11)           | -4(10)          |
| C(5) | 51(17)          | 48(16)          | 54(17)          | -3(14)          | -2(13)          | -4(14)          |
| C(6) | 54(18)          | 50(17)          | 58(18)          | 10(15)          | 19(14)          | 8(15)           |
| C(7) | 45(15)          | 49(16)          | 47(15)          | 4(13)           | 10(12)          | -1(13)          |
| N(1) | 40(11)          | 65(15)          | 20(9)           | -12(11)         | -8(8)           | 4(10)           |
| N(2) | 52(13)          | 52(13)          | 23(10)          | -7(11)          | -11(9)          | 3(10)           |
| N(3) | 38(11)          | 44(12)          | 17(9)           | -1(9)           | -12(8)          | 0(8)            |
| N(4) | 38(11)          | 39(12)          | 35(11)          | 2(10)           | -6(9)           | 3(9)            |
| Cl   | 77(5)           | 81(6)           | 29(3)           | -5(5)           | 6(3)            | -12(4)          |
| Hg   | 45(6)           | 46(6)           | 26(5)           | -3(5)           | -3(3)           | -3(4)           |



Table S9. Hydrogen coordinates ( $\times 10^4$ ) and isotropic displacement parameters ( $\text{\AA}^2 \times 10^3$ ) for **2b**.

---

| Atom | x    | y    | z    | U(eq) |
|------|------|------|------|-------|
| H(2) | 3456 | -877 | 9905 | 51    |
| H(4) | 5666 | 5416 | 9087 | 50    |
| H(5) | 6838 | 8364 | 8394 | 61    |
| H(6) | 6745 | 8658 | 6819 | 64    |
| H(7) | 5530 | 5932 | 6033 | 56    |

---

Table S10. Bond lengths [ $\text{\AA}$ ] and angles [ $^\circ$ ] for **2b**.

---

| Bond lengths   |           |                |           |
|----------------|-----------|----------------|-----------|
| C(1)-N(1)      | 1.330(3)  | C(3)-N(4)      | 1.310(3)  |
| C(5)-C(6)      | 1.410(4)  | N(1)-Hg        | 2.560(2)  |
| C(1)-N(3)      | 1.340(3)  | C(3)-C(4)      | 1.320(3)  |
| C(1)-Hg        | 2.060(2)  | N(2)-N(3)      | 1.370(2)  |
| C(6)-C(7)      | 1.360(4)  | C(3)-N(3)      | 1.440(3)  |
| C(2)-N(2)      | 1.310(3)  | Cl-Hg          | 2.301(6)  |
| C(2)-N(1)      | 1.400(3)  | C(4)-C(5)      | 1.380(4)  |
| C(7)-N(4)      | 1.350(3)  | Hg-N(1)        | 2.560(2)  |
| N(4)-Hg        | 2.750(2)  |                |           |
| Angles         |           |                |           |
| N(1)-C(1)-N(3) | 108.0(2)  | C(2)-N(2)-N(3) | 101.7(19) |
| N(1)-C(1)-Hg   | 129.1(18) | C(3)-C(4)-C(5) | 117.0(2)  |
| N(3)-C(1)-Hg   | 122.9(17) | C(1)-N(3)-N(2) | 112.0(2)  |
| N(4)-C(7)-C(6) | 123.0(3)  | C(1)-N(3)-C(3) | 126.5(19) |
| N(2)-C(2)-N(1) | 114.0(2)  | N(2)-N(3)-C(3) | 120.8(19) |
| C(1)-N(1)-C(2) | 104.0(2)  | C(4)-C(5)-C(6) | 120.0(3)  |
| N(4)-C(3)-C(4) | 127.0(2)  | C(3)-N(4)-C(7) | 117.0(2)  |
| C(1)-N(1)-Hg   | 132.4(15) | C(1)-Hg-Cl     | 168.5(7)  |
| N(4)-C(3)-N(3) | 115.0(2)  | C(1)-Hg-N(1)   | 96.4(8)   |
| C(2)-N(1)-Hg   | 123.8(16) | C(7)-C(6)-C(5) | 117.0(3)  |
| C(4)-C(3)-N(3) | 118.0(2)  | Cl-Hg-N(1)     | 95.0(5)   |
| N(4)-Hg-Cl     | 109.8(5)  | C(1)-Hg-N(4)   | 69.4(8)   |
| N(1)-Hg-N(4)   | 100.4(6)  |                |           |

---

Symmetry transformations used to generate equivalent atoms:

Table S11. Crystal data and structure refinement for **3a**.

|                                   |                                                                                |                 |
|-----------------------------------|--------------------------------------------------------------------------------|-----------------|
| Empirical formula                 | C <sub>18</sub> H <sub>18</sub> B <sub>2</sub> F <sub>8</sub> HgN <sub>6</sub> |                 |
| Formula weight                    | 692.59                                                                         |                 |
| Temperature                       | 200(2) K                                                                       |                 |
| Wavelength                        | 0.71073 Å                                                                      |                 |
| Crystal system                    | Monoclinic                                                                     |                 |
| Space group                       | P2(1)/c                                                                        |                 |
| Unit cell dimensions              | a = 8.7365(6) Å                                                                | α = 90°.        |
|                                   | b = 20.9783(15) Å                                                              | β = 97.131(5)°. |
|                                   | c = 12.9687(10) Å                                                              | γ = 90°.        |
| Volume                            | 2358.5(3) Å <sup>3</sup>                                                       |                 |
| Z                                 | 4                                                                              |                 |
| Density (calculated)              | 1.951 Mg/m <sup>3</sup>                                                        |                 |
| Absorption coefficient            | 6.608 mm <sup>-1</sup>                                                         |                 |
| F(000)                            | 1320                                                                           |                 |
| Crystal size                      | 0.32 x 0.28 x 0.10 mm <sup>3</sup>                                             |                 |
| Theta range for data collection   | 1.857 to 24.983°.                                                              |                 |
| Index ranges                      | -10 ≤ h ≤ 9, -24 ≤ k ≤ 24, -14 ≤ l ≤ 15                                        |                 |
| Reflections collected             | 12493                                                                          |                 |
| Independent reflections           | 3766 [R(int) = 0.0530]                                                         |                 |
| Completeness to theta = 24.983°   | 98.3 %                                                                         |                 |
| Absorption correction             | multi-scan SADABS                                                              |                 |
| Max. and min. transmission        | 0.558 and 0.226                                                                |                 |
| Refinement method                 | Full-matrix least-squares on F <sup>2</sup>                                    |                 |
| Data / restraints / parameters    | 3766 / 261 / 316                                                               |                 |
| Goodness-of-fit on F <sup>2</sup> | 1.060                                                                          |                 |
| Final R indices [I > 2σ(I)]       | R1 = 0.0550, wR2 = 0.1231                                                      |                 |
| R indices (all data)              | R1 = 0.0786, wR2 = 0.1343                                                      |                 |
| Largest diff. peak and hole       | 4.983 and -2.445 e.Å <sup>-3</sup>                                             |                 |

$$^a R_1 = \frac{\sum ||F_o| - |F_c||}{\sum |F_o|}$$

$$^b wR_2 = \{\sum w(F_o^2 - F_c^2)^2 / \sum w(F_o^2)^2\}^{1/2}$$

Table S12. Atomic coordinates ( $\times 10^4$ ) and equivalent isotropic displacement parameters ( $\text{\AA}^2 \times 10^3$ ) for **3a**.

| Atom  | x         | y        | z        | U(eq) <sup>a</sup> |
|-------|-----------|----------|----------|--------------------|
| C(1)  | 3449(12)  | 7769(5)  | 2920(8)  | 25(2)              |
| C(2)  | 3955(15)  | 6622(6)  | 3477(11) | 44(3)              |
| C(3)  | 5842(13)  | 7543(6)  | 3593(10) | 36(3)              |
| C(4)  | 3984(13)  | 8924(6)  | 2729(9)  | 30(2)              |
| C(5)  | 4563(16)  | 9408(6)  | 3369(11) | 45(3)              |
| C(6)  | 4216(18)  | 10039(7) | 3082(14) | 61(4)              |
| C(7)  | 3274(18)  | 10152(7) | 2165(13) | 62(4)              |
| C(8)  | 2721(16)  | 9659(6)  | 1531(12) | 53(3)              |
| C(9)  | 3113(14)  | 9041(6)  | 1808(10) | 37(3)              |
| C(10) | -1162(12) | 7793(5)  | 1801(8)  | 20(2)              |
| C(11) | -1752(15) | 6658(5)  | 1213(11) | 43(3)              |
| C(12) | -3491(14) | 7612(6)  | 1067(9)  | 32(2)              |
| C(13) | -1574(13) | 8951(5)  | 2089(10) | 30(2)              |
| C(14) | -1980(17) | 9459(6)  | 1431(12) | 53(4)              |
| C(15) | -1590(2)  | 10066(7) | 1789(14) | 71(5)              |
| C(16) | -851(19)  | 10149(7) | 2765(13) | 68(4)              |
| C(17) | -443(18)  | 9642(7)  | 3407(13) | 62(4)              |
| C(18) | -850(14)  | 9039(6)  | 3059(11) | 39(3)              |
| B(1)  | 2743(17)  | 8269(7)  | 5477(12) | 37(3)              |
| B(2)  | 9616(16)  | 6743(7)  | 4291(11) | 32(2)              |
| N(1)  | 4380(11)  | 7293(4)  | 3311(7)  | 32(2)              |
| N(2)  | 5858(10)  | 8135(5)  | 3446(7)  | 34(2)              |
| N(3)  | 4375(10)  | 8280(4)  | 3034(7)  | 26(19)             |
| N(4)  | -2110(11) | 7334(4)  | 1407(7)  | 28(2)              |
| N(5)  | -3503(11) | 8221(5)  | 1259(7)  | 35(2)              |
| N(6)  | -2015(10) | 8326(4)  | 1724(7)  | 26(19)             |
| F(1)  | 3006(9)   | 7624(3)  | 5324(7)  | 57(2)              |
| F(2)  | 1871(8)   | 8331(3)  | 6289(6)  | 46(18)             |
| F(3)  | 1955(10)  | 8525(4)  | 4589(6)  | 65(2)              |
| F(4)  | 4156(8)   | 8562(4)  | 5726(7)  | 59(2)              |
| F(5)  | 10368(9)  | 6653(3)  | 3407(6)  | 49(19)             |
| F(6)  | 9363(8)   | 7390(3)  | 4400(6)  | 48(19)             |
| F(7)  | 8205(8)   | 6438(3)  | 4148(6)  | 55(2)              |
| F(8)  | 10514(9)  | 6499(4)  | 5142(6)  | 61(2)              |
| Hg    | 1149(5)   | 7749(2)  | 2372(3)  | 24(18)             |

<sup>a</sup> U(eq) is defined as one third of the trace of the orthogonalized  $U^{ij}$  tensor.

Table S13. Anisotropic displacement parameters ( $\text{\AA}^2 \times 10^3$ ) for **3a**.

| Atom  | U <sub>11</sub> | U <sub>22</sub> | U <sub>33</sub> | U <sub>12</sub> | U <sub>13</sub> | U <sub>23</sub> |
|-------|-----------------|-----------------|-----------------|-----------------|-----------------|-----------------|
| C(1)  | 18(4)           | 35(4)           | 23(5)           | 6(3)            | 8(3)            | 3(4)            |
| C(2)  | 36(7)           | 43(5)           | 52(9)           | 9(4)            | 6(6)            | 7(5)            |
| C(3)  | 17(4)           | 50(5)           | 39(7)           | 10(3)           | -1(4)           | 2(4)            |
| C(4)  | 21(5)           | 35(4)           | 36(5)           | 0(3)            | 7(4)            | 4(3)            |
| C(5)  | 47(7)           | 41(5)           | 48(6)           | -7(4)           | 5(6)            | -1(4)           |
| C(6)  | 68(9)           | 41(6)           | 74(8)           | -4(5)           | 13(7)           | 3(5)            |
| C(7)  | 65(9)           | 41(6)           | 79(8)           | -4(5)           | 12(7)           | 11(5)           |
| C(8)  | 49(8)           | 44(5)           | 66(8)           | -1(5)           | 10(6)           | 17(5)           |
| C(9)  | 32(6)           | 38(5)           | 40(6)           | -6(4)           | 4(5)            | 8(4)            |
| C(10) | 20(4)           | 25(4)           | 18(5)           | -7(3)           | 9(3)            | 6(3)            |
| C(11) | 44(7)           | 32(5)           | 51(8)           | -3(4)           | -1(7)           | -6(5)           |
| C(12) | 28(5)           | 46(5)           | 22(6)           | -6(3)           | 9(4)            | -3(4)           |
| C(13) | 19(5)           | 29(4)           | 44(5)           | 2(4)            | 8(4)            | -2(4)           |
| C(14) | 64(9)           | 34(5)           | 60(7)           | 7(5)            | 1(6)            | 4(4)            |
| C(15) | 87(11)          | 37(6)           | 88(9)           | 3(6)            | 7(8)            | -2(5)           |
| C(16) | 76(11)          | 39(6)           | 88(8)           | 1(6)            | 10(7)           | -14(5)          |
| C(17) | 66(9)           | 44(6)           | 76(8)           | -4(5)           | 4(7)            | -21(5)          |
| C(18) | 33(7)           | 34(5)           | 48(6)           | 6(4)            | -1(5)           | -9(4)           |
| B(1)  | 31(5)           | 42(5)           | 39(5)           | 3(4)            | 12(4)           | 3(4)            |
| B(2)  | 35(5)           | 31(5)           | 32(5)           | 4(4)            | 7(4)            | 1(4)            |
| N(1)  | 24(4)           | 41(4)           | 30(5)           | 8(3)            | 6(4)            | 5(4)            |
| N(2)  | 12(4)           | 56(5)           | 33(5)           | 1(3)            | 2(4)            | 9(4)            |
| N(3)  | 15(4)           | 38(4)           | 28(5)           | 4(3)            | 7(3)            | 2(3)            |
| N(4)  | 25(4)           | 31(4)           | 28(5)           | -7(3)           | 5(4)            | 1(3)            |
| N(5)  | 26(4)           | 46(4)           | 31(5)           | -3(3)           | 2(4)            | 0(4)            |
| N(6)  | 23(4)           | 29(3)           | 25(5)           | 0(3)            | 5(3)            | 4(3)            |
| F(1)  | 47(5)           | 48(4)           | 73(6)           | 8(3)            | 0(4)            | -15(3)          |
| F(2)  | 42(4)           | 51(4)           | 47(4)           | 6(3)            | 19(3)           | 6(3)            |
| F(3)  | 62(5)           | 83(6)           | 49(4)           | 14(4)           | 7(4)            | 18(4)           |
| F(4)  | 38(4)           | 52(4)           | 89(6)           | -5(3)           | 10(4)           | 2(4)            |
| F(5)  | 58(5)           | 48(4)           | 45(4)           | 11(3)           | 20(4)           | 5(3)            |
| F(6)  | 44(4)           | 37(4)           | 62(5)           | 7(3)            | 1(4)            | -10(3)          |
| F(7)  | 41(4)           | 49(4)           | 75(6)           | -6(3)           | 6(4)            | 3(4)            |
| F(8)  | 57(5)           | 80(5)           | 45(4)           | 14(4)           | 1(4)            | 17(4)           |
| Hg    | 20(3)           | 23(2)           | 29(3)           | 1(19)           | 3(18)           | 1(2)            |

Table S14. Hydrogen coordinates ( $\times 10^4$ ) and isotropic displacement parameters ( $\text{\AA}^2 \times 10^3$ ) for **3a**.

---

| Atom   | x     | y     | z    | U(eq) |
|--------|-------|-------|------|-------|
| H(2A)  | 4871  | 6384  | 3772 | 66    |
| H(2B)  | 3174  | 6606  | 3957 | 66    |
| H(2C)  | 3537  | 6431  | 2811 | 66    |
| H(3)   | 6717  | 7299  | 3862 | 43    |
| H(5)   | 5194  | 9317  | 4002 | 54    |
| H(6)   | 4621  | 10382 | 3509 | 73    |
| H(7)   | 3004  | 10578 | 1971 | 74    |
| H(8)   | 2071  | 9743  | 903  | 64    |
| H(9)   | 2775  | 8699  | 1356 | 44    |
| H(11A) | -2695 | 6438  | 917  | 65    |
| H(11B) | -983  | 6635  | 725  | 65    |
| H(11C) | -1342 | 6454  | 1869 | 65    |
| H(12)  | -4352 | 7386  | 727  | 38    |
| H(14)  | -2510 | 9393  | 755  | 64    |
| H(15)  | -1838 | 10425 | 1353 | 85    |
| H(16)  | -611  | 10569 | 3008 | 81    |
| H(17)  | 110   | 9706  | 4077 | 75    |
| H(18)  | -622  | 8682  | 3504 | 47    |

---

Table S15. Bond lengths [ $\text{\AA}$ ] and angles [ $^\circ$ ] for **3a**.

| Bond lengths      |           |                  |           |
|-------------------|-----------|------------------|-----------|
| C(1)-N(3)         | 1.339(14) | C(17)-C(18)      | 1.376(17) |
| C(1)-N(1)         | 1.347(13) | C(6)-C(7)        | 1.380(2)  |
| C(1)-Hg           | 2.047(11) | C(7)-C(8)        | 1.370(2)  |
| C(12)-N(5)        | 1.301(15) | B(1)-F(3)        | 1.376(16) |
| C(2)-N(1)         | 1.478(15) | B(1)-F(2)        | 1.380(16) |
| C(12)-N(4)        | 1.364(15) | C(8)-C(9)        | 1.375(17) |
| C(13)-C(18)       | 1.349(18) | B(1)-F(4)        | 1.381(16) |
| C(13)-C(14)       | 1.383(17) | B(1)-F(1)        | 1.391(16) |
| C(3)-N(2)         | 1.257(15) | B(2)-F(8)        | 1.371(15) |
| C(13)-N(6)        | 1.431(14) | C(10)-N(4)       | 1.330(13) |
| C(3)-N(1)         | 1.387(15) | B(2)-F(7)        | 1.381(16) |
| C(14)-C(15)       | 1.383(19) | C(10)-N(6)       | 1.340(13) |
| C(4)-C(9)         | 1.357(15) | B(2)-F(6)        | 1.385(15) |
| C(15)-C(16)       | 1.360(2)  | C(10)-Hg         | 2.064(10) |
| C(4)-C(5)         | 1.368(17) | B(2)-F(5)        | 1.404(15) |
| C(4)-N(3)         | 1.438(14) | C(11)-N(4)       | 1.480(14) |
| C(16)-C(17)       | 1.370(2)  | N(2)-N(3)        | 1.373(12) |
| C(5)-C(6)         | 1.396(18) | N(5)-N(6)        | 1.381(12) |
| Angles            |           |                  |           |
| N(3)-C(1)-N(1)    | 102.9(9)  | C(7)-C(8)-C(9)   | 119.7(14) |
| C(14)-C(13)-N(6)  | 117.7(12) | F(7)-B(2)-F(6)   | 108.5(10) |
| N(3)-C(1)-Hg      | 127.5(8)  | F(8)-B(2)-F(5)   | 109.1(10) |
| C(15)-C(14)-C(13) | 117.9(15) | F(7)-B(2)-F(5)   | 109.2(11) |
| N(1)-C(1)-Hg      | 129.5(8)  | C(4)-C(9)-C(8)   | 119.6(13) |
| C(16)-C(15)-C(14) | 120.0(15) | F(6)-B(2)-F(5)   | 108.2(10) |
| C(15)-C(16)-C(17) | 121.6(14) | C(1)-N(1)-C(3)   | 108.2(10) |
| N(2)-C(3)-N(1)    | 111.2(10) | C(1)-N(1)-C(2)   | 127.6(10) |
| C(16)-C(17)-C(18) | 118.6(15) | N(4)-C(10)-N(6)  | 105.2(9)  |
| C(9)-C(4)-C(5)    | 121.6(11) | C(3)-N(1)-C(2)   | 124.2(10) |
| C(9)-C(4)-N(3)    | 120.0(11) | N(4)-C(10)-Hg    | 129.8(8)  |
| C(13)-C(18)-C(17) | 120.2(13) | C(3)-N(2)-N(3)   | 104.4(10) |
| C(5)-C(4)-N(3)    | 118.3(11) | N(6)-C(10)-Hg    | 125.0(7)  |
| C(4)-C(5)-C(6)    | 119.3(14) | C(1)-N(3)-N(2)   | 113.2(9)  |
| F(3)-B(1)-F(2)    | 109.6(11) | C(1)-N(3)-C(4)   | 127.0(9)  |
| F(3)-B(1)-F(4)    | 111.2(11) | N(2)-N(3)-C(4)   | 119.7(9)  |
| C(7)-C(6)-C(5)    | 118.6(15) | C(10)-N(4)-C(12) | 107.3(9)  |
| F(2)-B(1)-F(4)    | 110.0(12) | C(10)-N(4)-C(11) | 128.6(10) |
| F(3)-B(1)-F(1)    | 109.5(12) | C(12)-N(4)-C(11) | 123.5(10) |
| F(2)-B(1)-F(1)    | 108.5(11) | C(12)-N(5)-N(6)  | 102.2(9)  |
| C(8)-C(7)-C(6)    | 121.0(14) | N(5)-C(12)-N(4)  | 112.7(10) |
| F(4)-B(1)-F(1)    | 107.9(11) | C(10)-N(6)-N(5)  | 112.5(9)  |
| F(8)-B(2)-F(7)    | 110.3(11) | C(10)-N(6)-C(13) | 128.0(9)  |
| F(8)-B(2)-F(6)    | 111.5(11) | N(5)-N(6)-C(13)  | 119.4(9)  |

|                   |           |                  |           |
|-------------------|-----------|------------------|-----------|
| C(18)-C(13)-C(14) | 121.7(11) | C(18)-C(13)-N(6) | 120.5(11) |
| C(1)-Hg-C(10)     | 176.2(4)  |                  |           |

---

Symmetry transformations used to generate equivalent atoms:
